# Supplementary material for: Identification of Differential Compositions of Aqueous Extracts of Cinnamomi Ramulus and Cinnamomi Cortex
Source: MDPI journal article supplement (doi:10.3390/molecules28052015), 2023-02-21
Supplement: s1 [file s1]

# Supplementary materials

## Identification of differential compositions of aqueous extracts of *Cinnamomi ramulus* and *Cinnamomi cortex*

Pei Wang <sup>1,2,†</sup>, Jun Chi<sup>1,2,†</sup>, Hui Guo <sup>1,2</sup>, Shun-Xiang Wang <sup>1,2</sup>, Jing Wang <sup>1,2</sup>, Er-Ping Xu <sup>1,2</sup>, Li-Ping Dai <sup>1,2,\*</sup>, Zhi-Min Wang <sup>2,3\*</sup>

<sup>1</sup> Henan University of Chinese Medicine, Zhengzhou 450046, China

<sup>2</sup> Engineering Technology Research Center for Comprehensive Development and Utilization of Authentic Medicinal Materials in Henan Province, Henan University of Chinese Medicine, Zhengzhou 450046, China

<sup>3</sup> National Engineering Laboratory for Quality Control Technology of Chinese Herbal Medicines, Institute of Chinese Materia Medica, China Academy of Chinese Medical Sciences, Beijing 100700, China

\* Correspondence: zhmw123@163.com (Z.-M.W.); liping\_dai@hactcm.edu.cn (L.-P.D.); Tel.: +86-18703651652

† These authors contributed equally to this work.

## List of Contents

|                                                                                                                    |     |
|--------------------------------------------------------------------------------------------------------------------|-----|
| Figure S1. Typical total ion chromatograms (TIC) of CR (A) and CC (B) in both positive and negative ion modes..... | S1  |
| Figure S2. Mass spectra and structural formulas of all detected compounds.....                                     | S2  |
| Figure S3. Identified compound structures.....                                                                     | S17 |
| Figure S4. Extracted ion chromatograms (EIC) of 8 standards.....                                                   | S17 |
| Figure S5. The MS <sup>2</sup> spectra of <i>trans</i> -cinnamic acid.....                                         | S18 |
| Figure S6. The MS <sup>2</sup> spectra of <i>trans</i> -cinnamaldehyde.....                                        | S19 |
| Figure S7. The MS <sup>2</sup> spectra of epicatechin.....                                                         | S19 |
| Figure S8. The MS <sup>2</sup> spectra of coumarin.....                                                            | S20 |
| Figure S9. 2D PCA score scatter plot for CR and CC after eliminating outliers.....                                 | S20 |
| Figure S10. 2D OPLS-DA score scatter plot for CR and CC.....                                                       | S20 |
| Figure S11. Validate model of OPLS-DA.....                                                                         | S21 |
| Figure S12. Variable importance of projection (VIP) plot of the OPLS-DA.....                                       | S21 |
| Figure S13. HPLC chromatograms for quantitative analyses.....                                                      | S21 |
| Figure S14. Dendrograms of hierarchical cluster analysis (HCA) for CR and CC.....                                  | S22 |
| Figure S15. The workflow of compound screening with Compound Discoverer 3.2.....                                   | S22 |
| Table S1. Optimization of the LC-MS conditions.....                                                                | S23 |
| Table S2. Compound information with VIP>1.....                                                                     | S24 |
| Table S3. Results of recovery rate.....                                                                            | S25 |
| Table S4. Molecular docking fraction.....                                                                          | S26 |
| Table S5. Information on CR and CC.....                                                                            | S27 |
| <b>Identification of other constituents of CR and CC</b>                                                           |     |
| S1. Identification of other phenylpropanoids and phenolic acids.....                                               | S28 |
| S2. Identification of other flavonoids.....                                                                        | S30 |

|                                           |     |
|-------------------------------------------|-----|
| S3. Identification of other coumarin..... | S31 |
| S4. Identification of other Lignans.....  | S31 |
| S5. Identification of terpenoids.....     | S31 |
| S6. Identification of organic acids.....  | S32 |
| S7. Identification of others.....         | S33 |

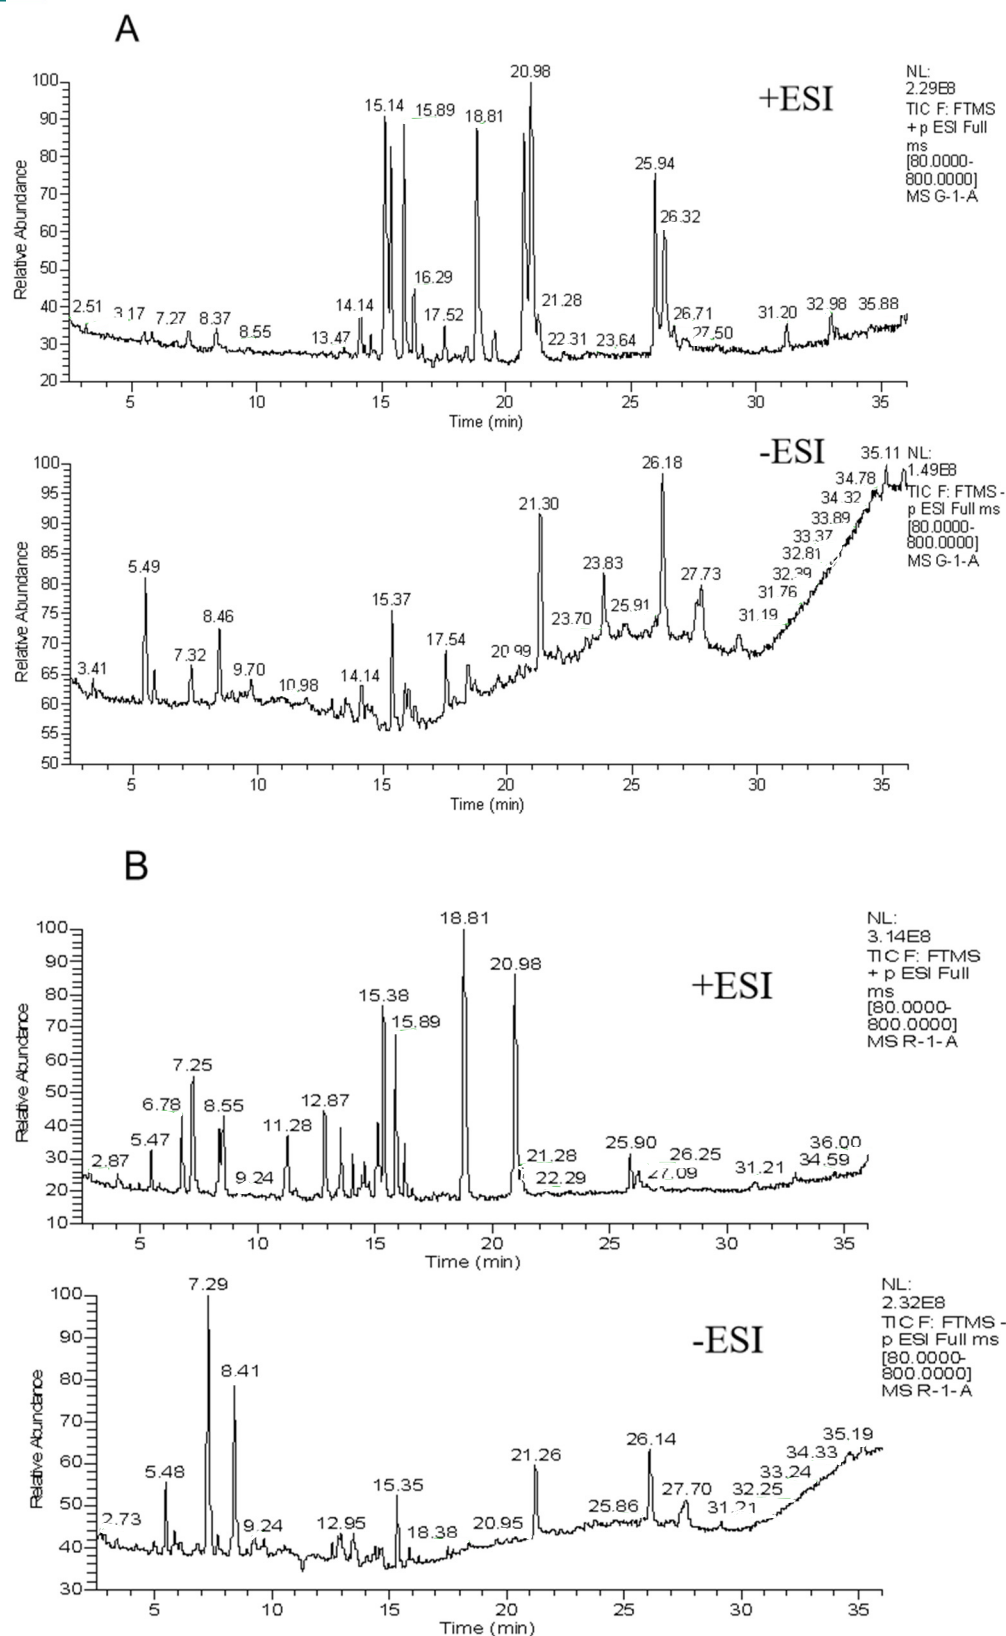

**Figure S1.** Typical total ion chromatograms (TIC) of CR (A) and CC (B) in both positive and negative ion modes.

**Figure S2.** Mass spectra and structural formulas of all detected compounds.

**Compound 1**

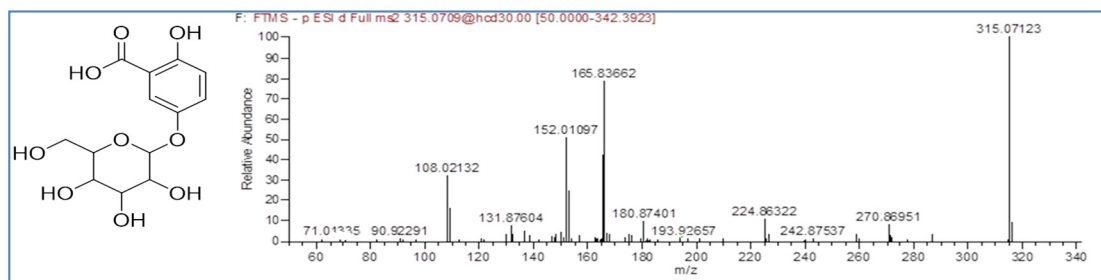

**Compound 2**

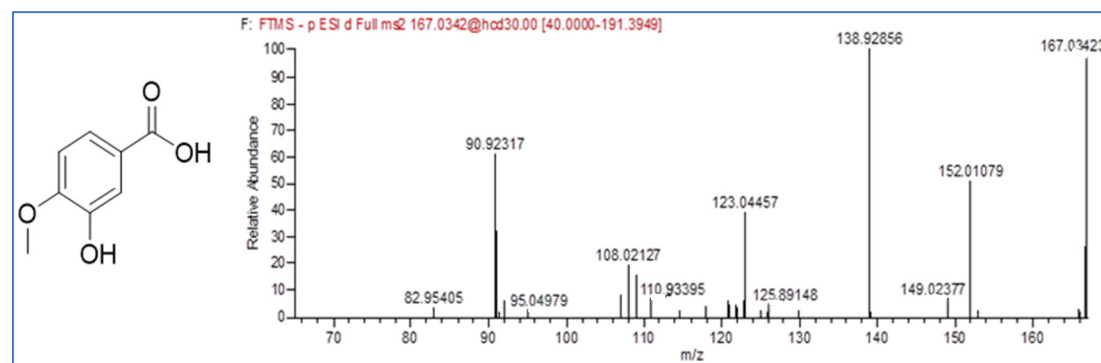

**Compound 3**

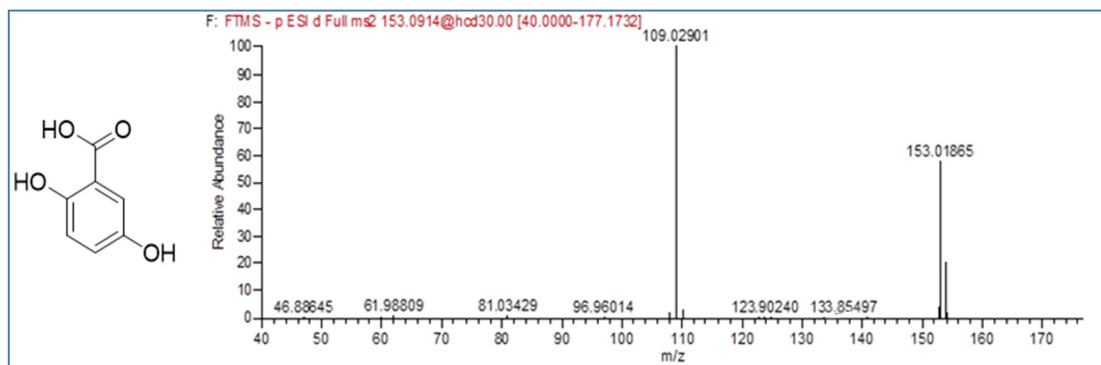

**Compound 4**

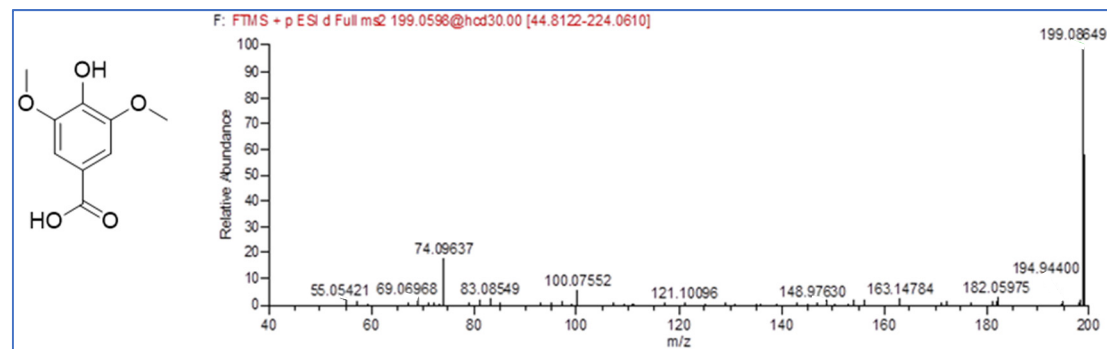

Compound 5

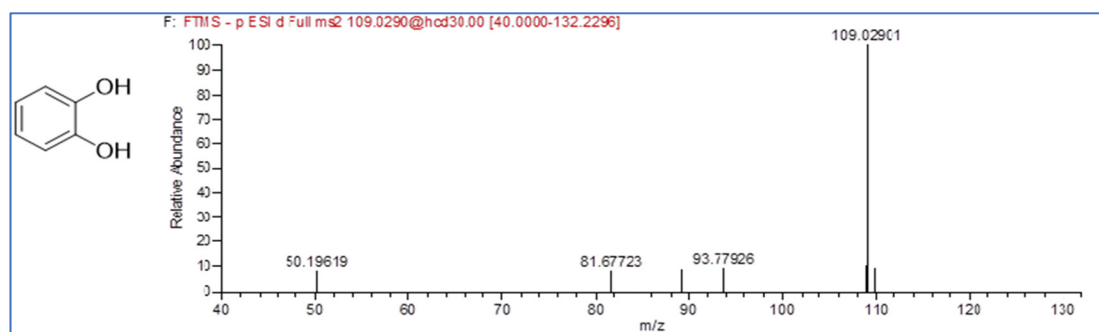

Compound 6

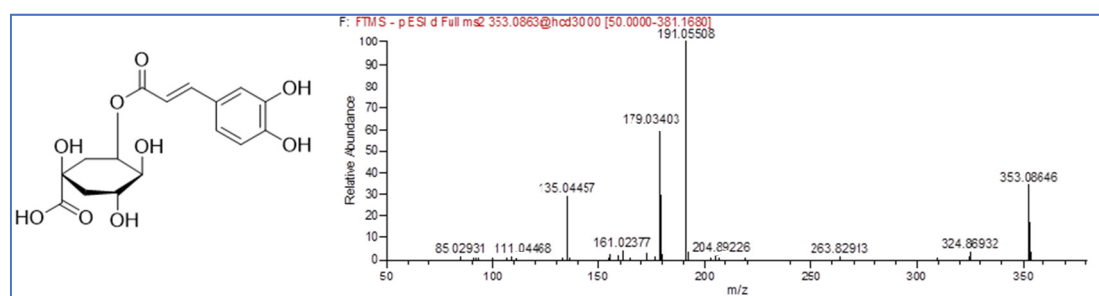

Compound 7

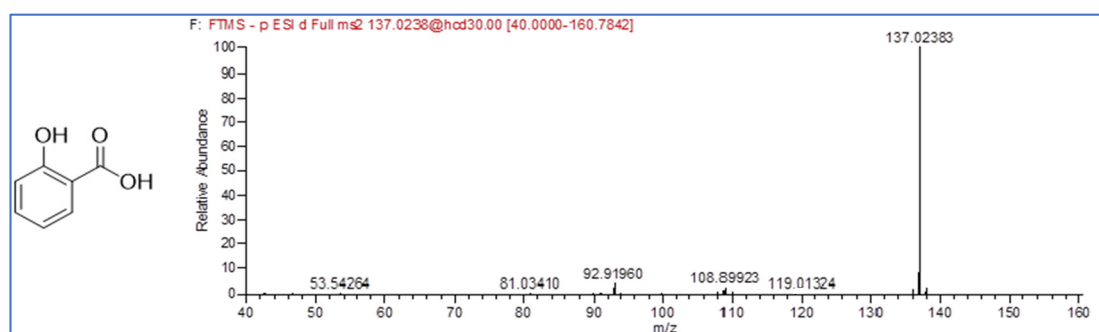

Compound 8

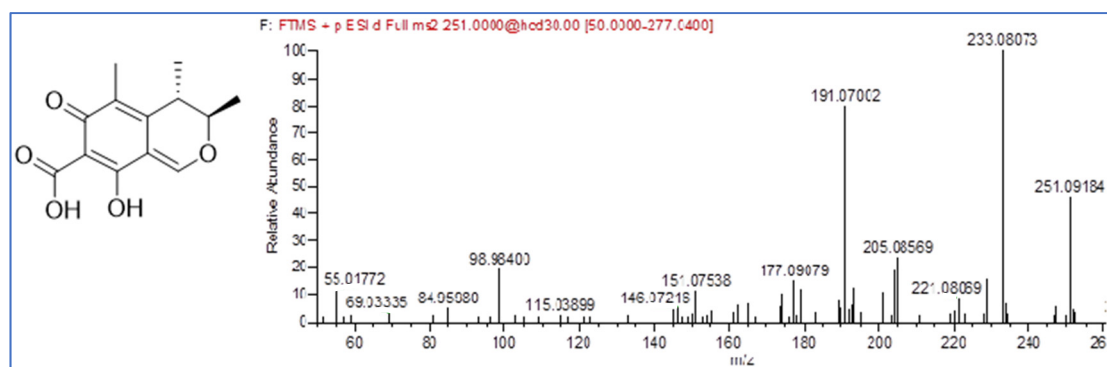

### Compound 9

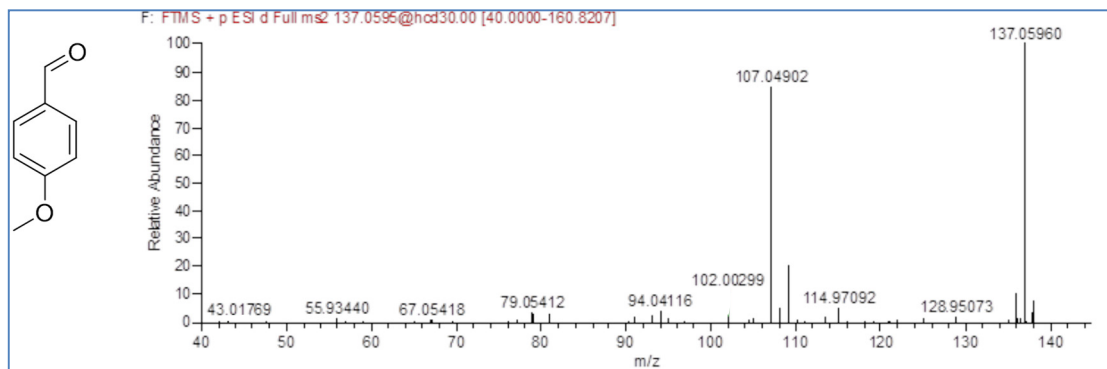

### Compound 10

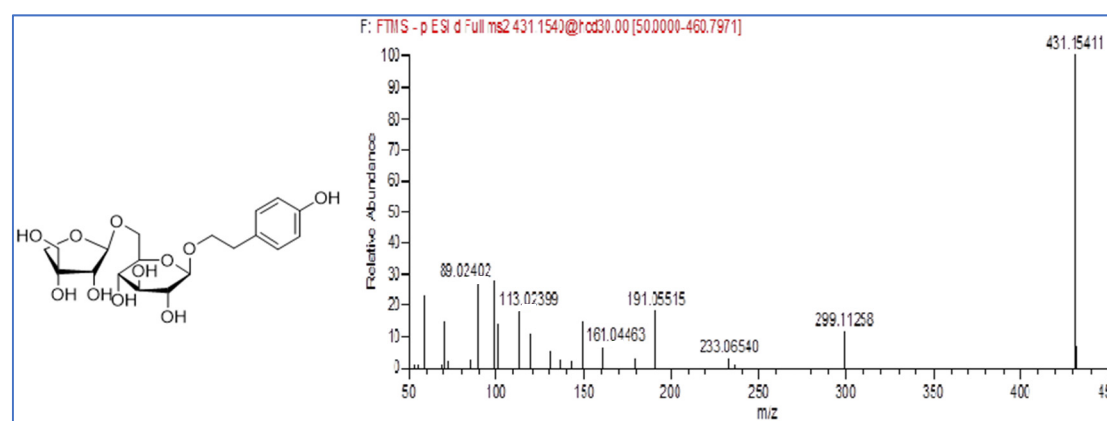

### Compound 11

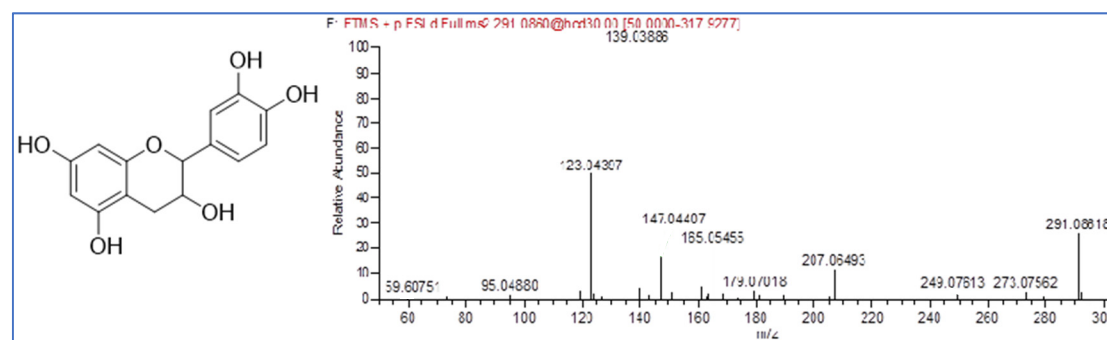

### Compound 12

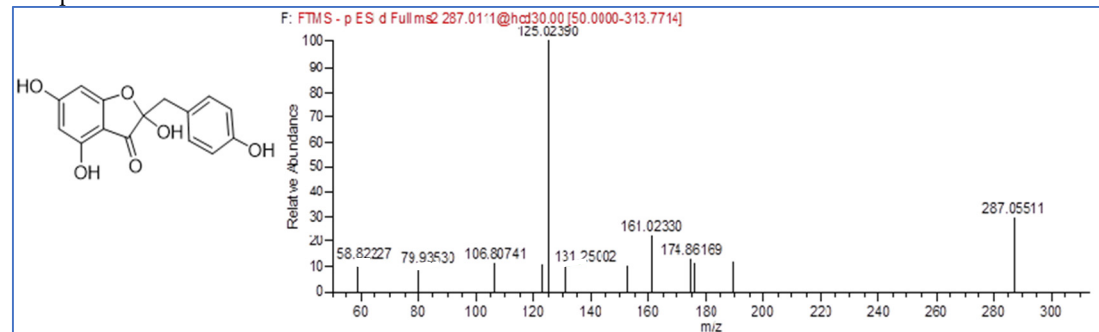

### Compound 13

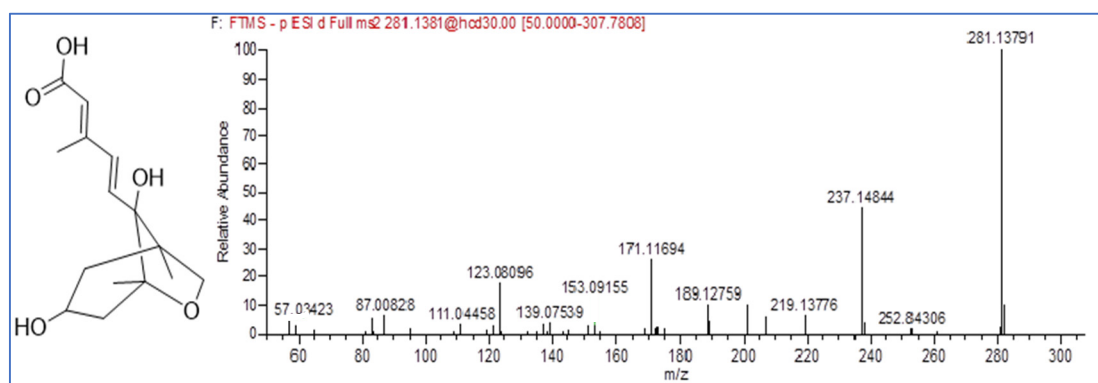

### Compound 14

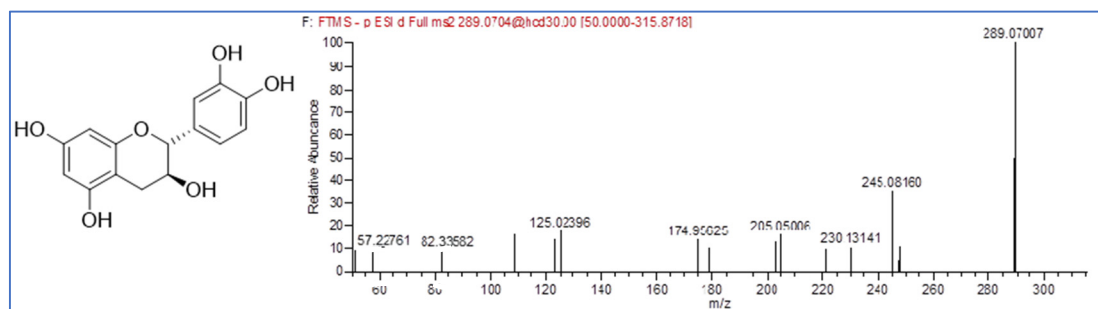

### Compound 15

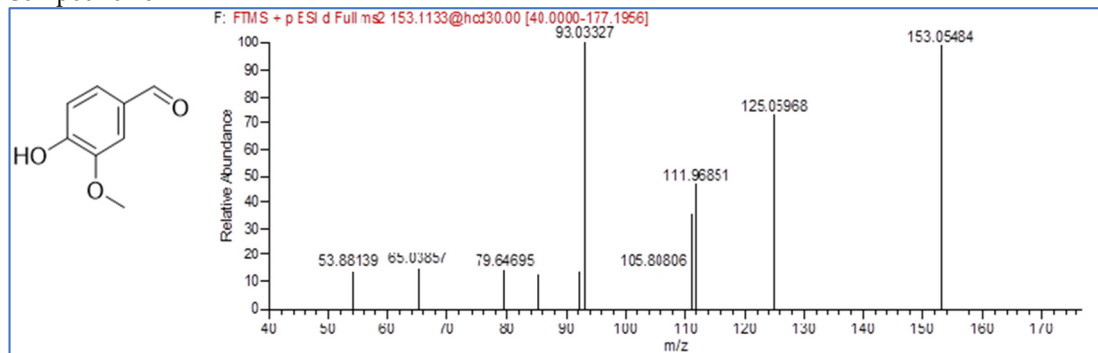

### Compound 16

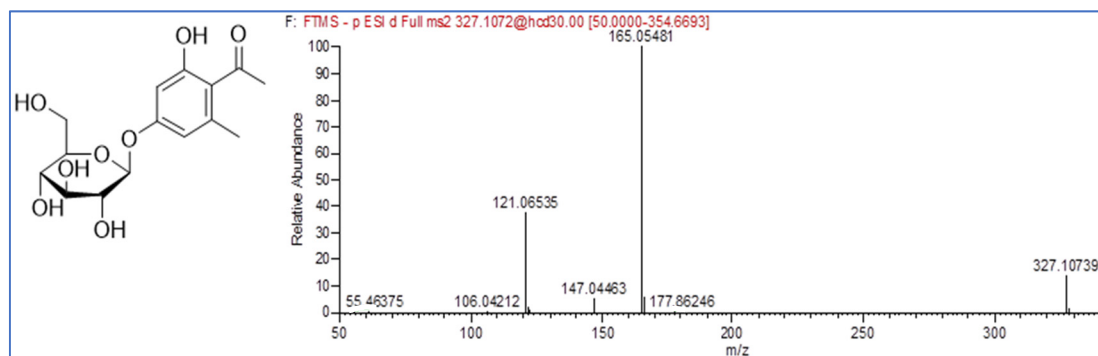

### Compound 17

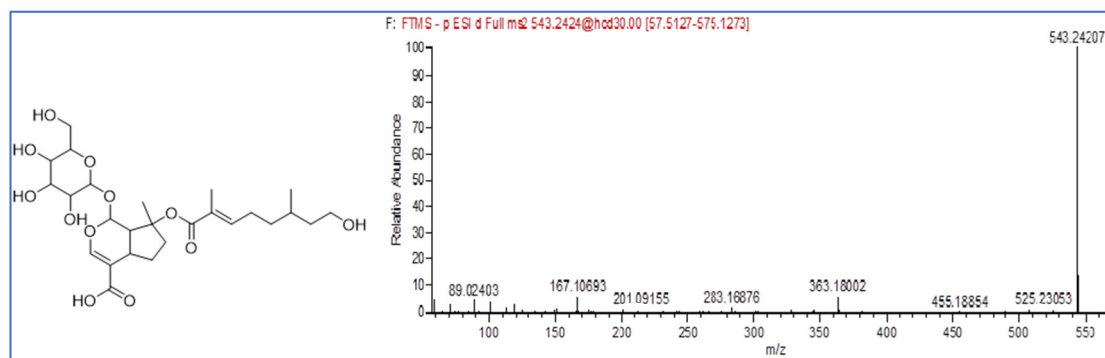

### Compound 18

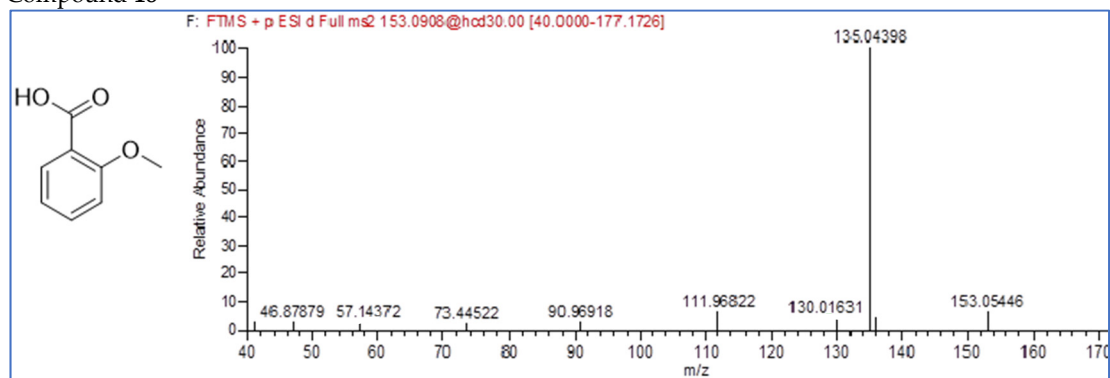

### Compound 19

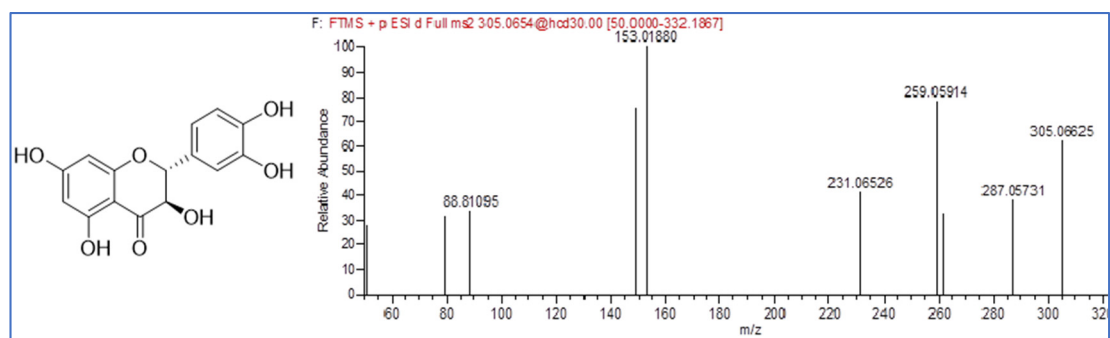

### Compound 20

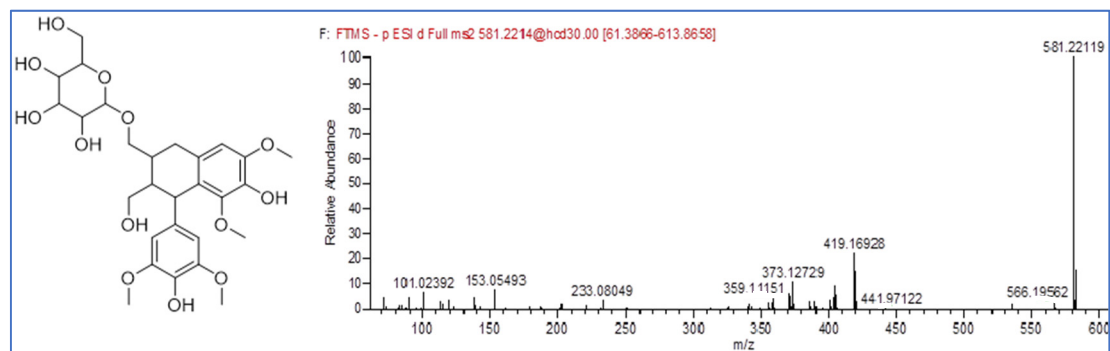

### Compound 21

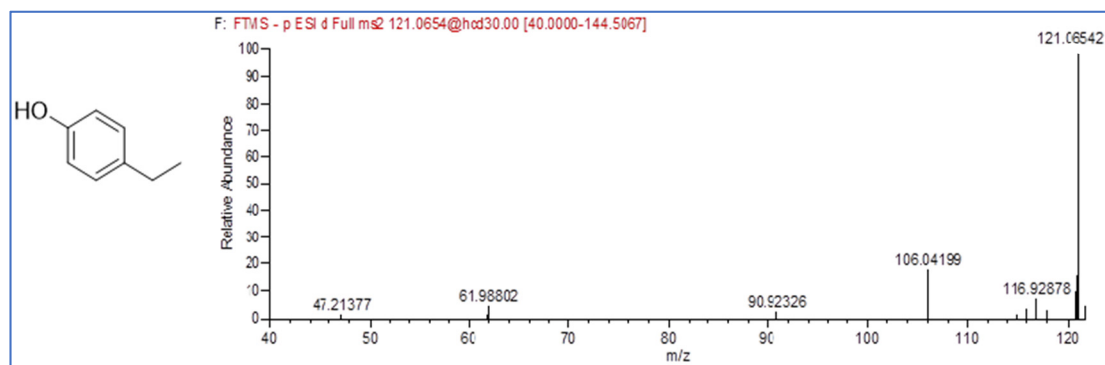

### Compound 22

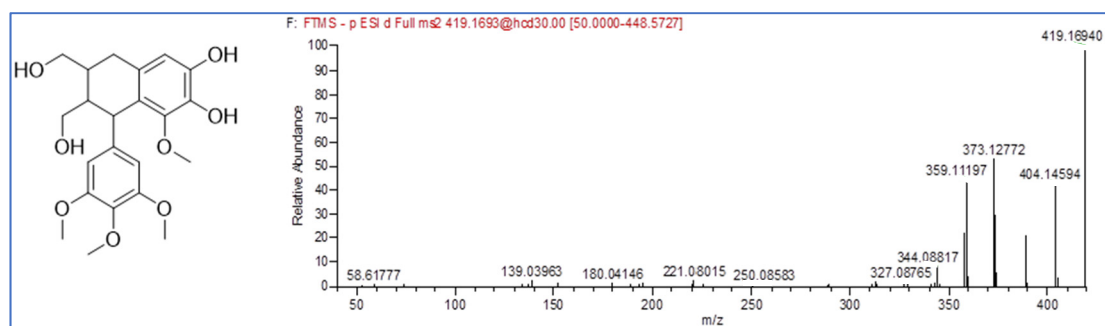

### Compound 23

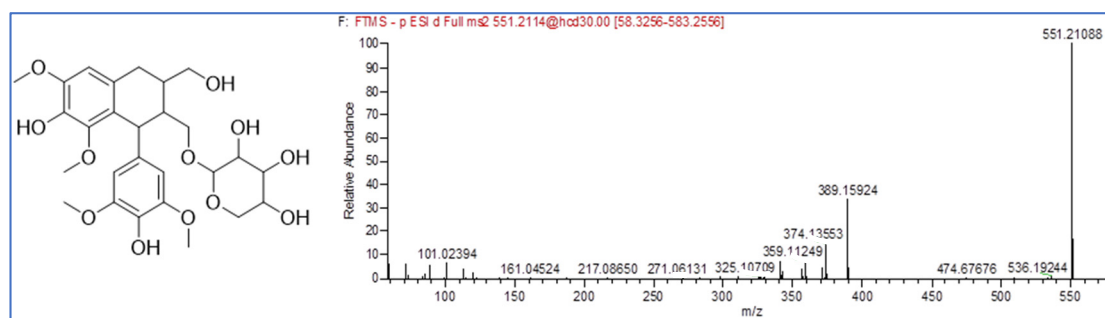

### Compound 24

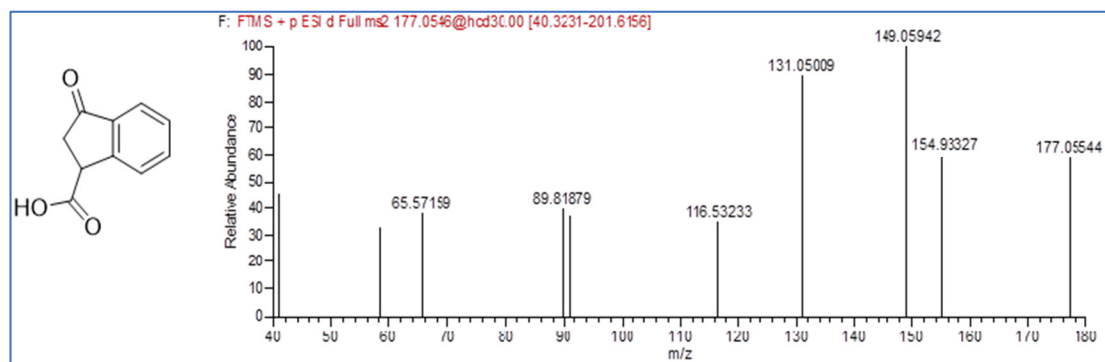

Compound 25

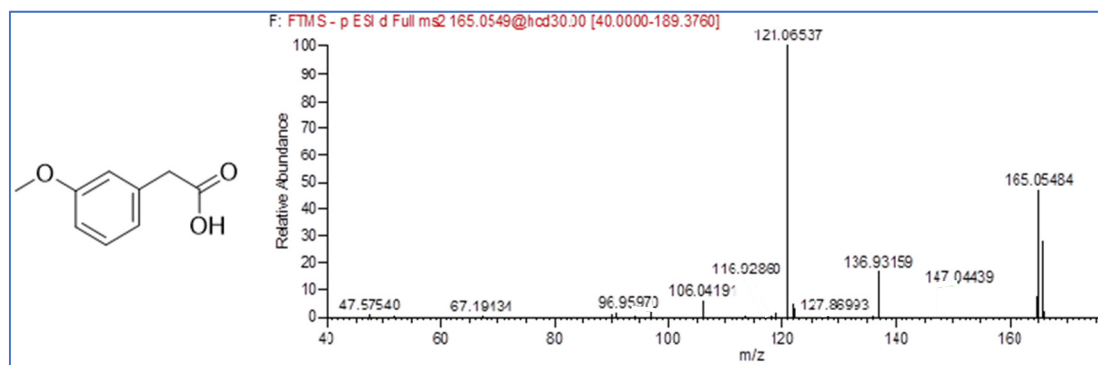

Compound 26

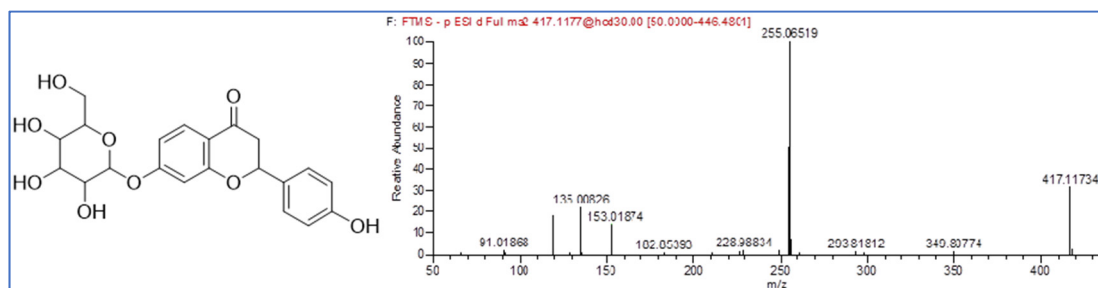

Compound 27

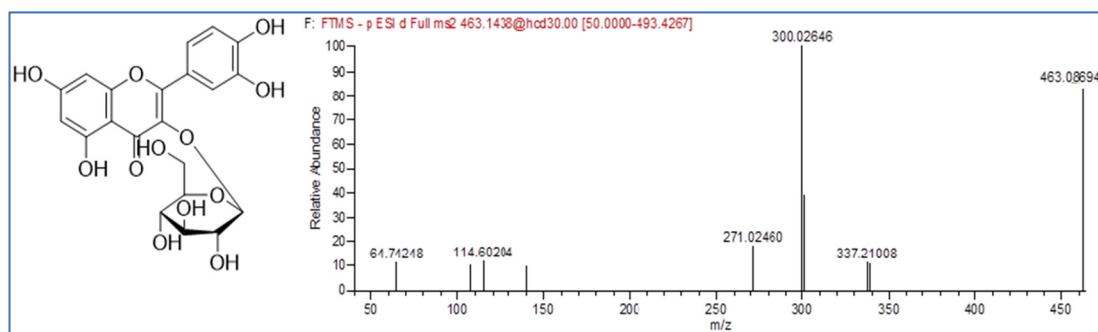

Compound 28

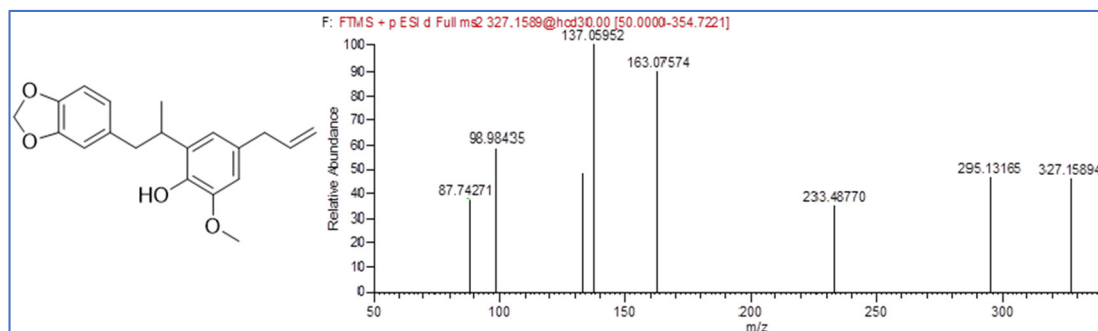

Compound 29

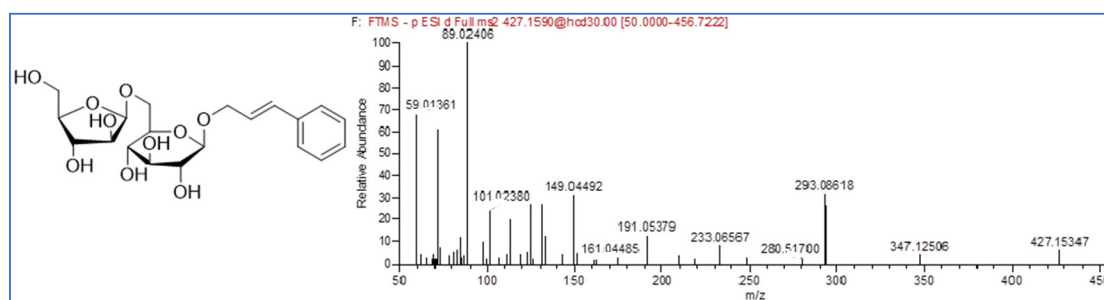

Compound 30

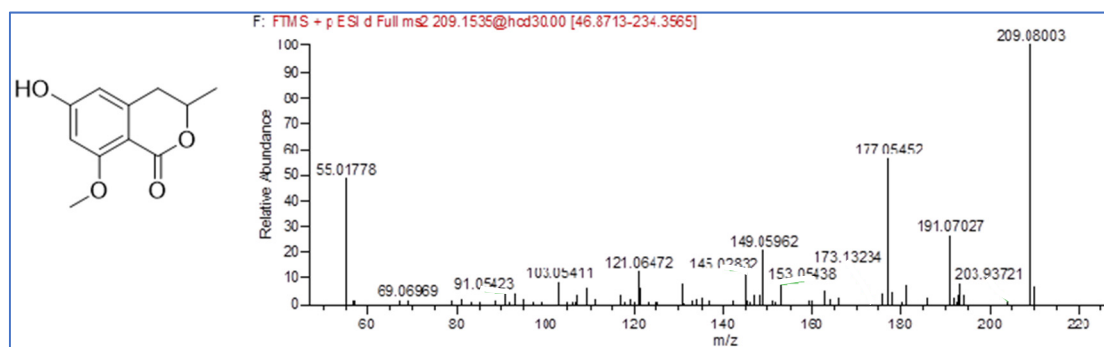

Compound 31

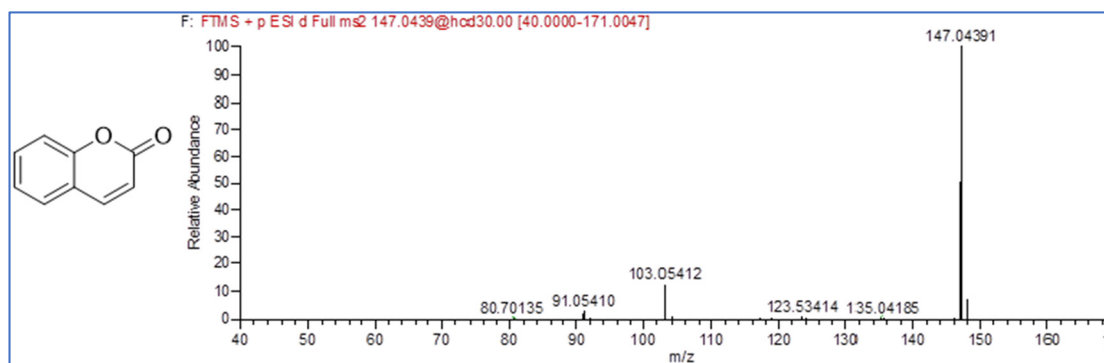

Compound 32

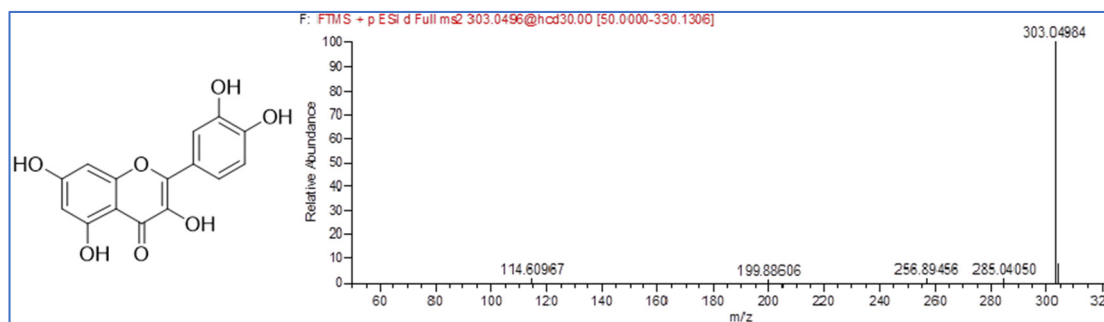

Compound 33

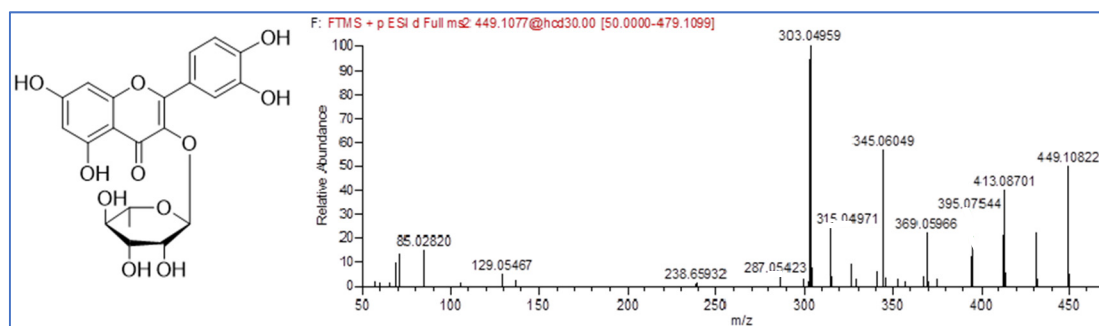

Compound 34

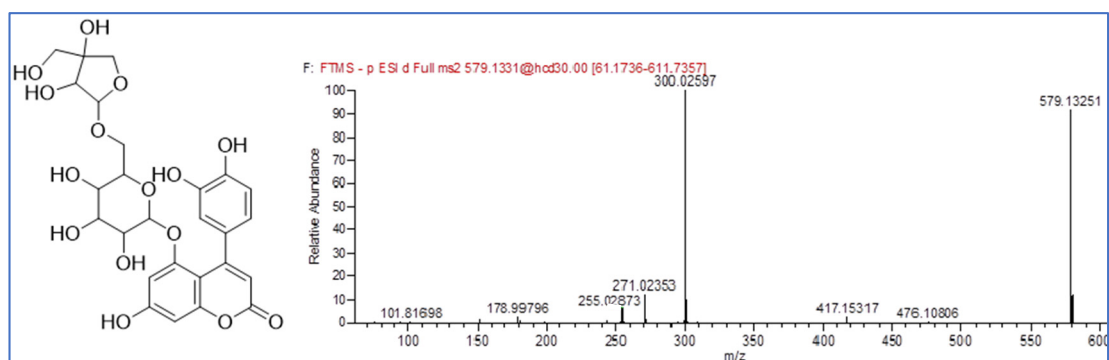

Compound 35

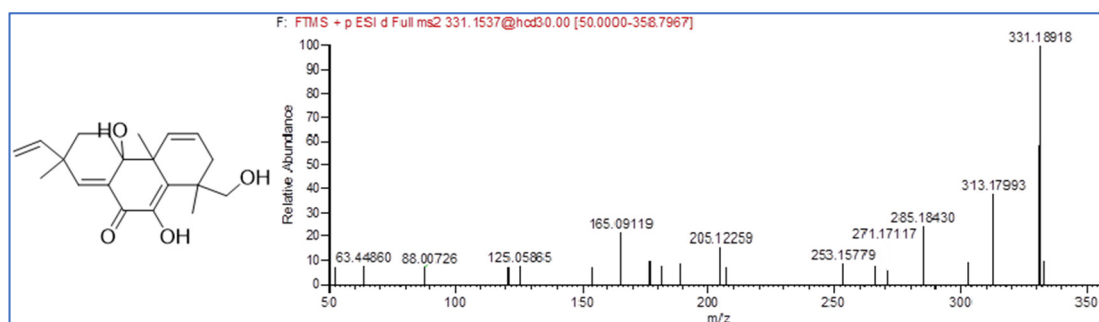

Compound 36

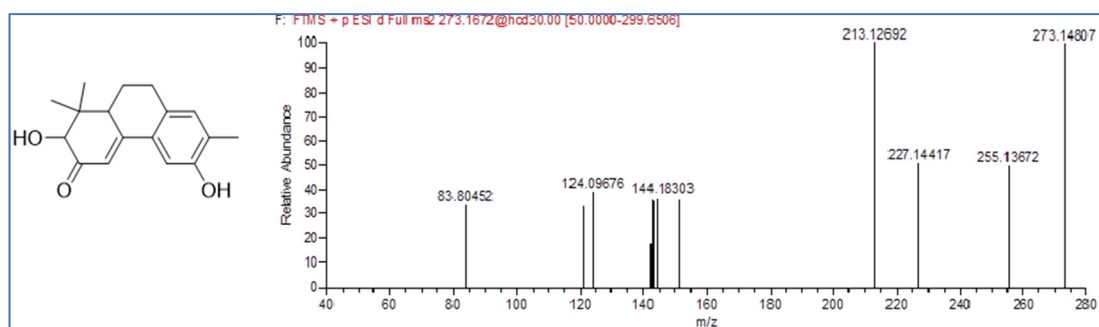

Compound 37

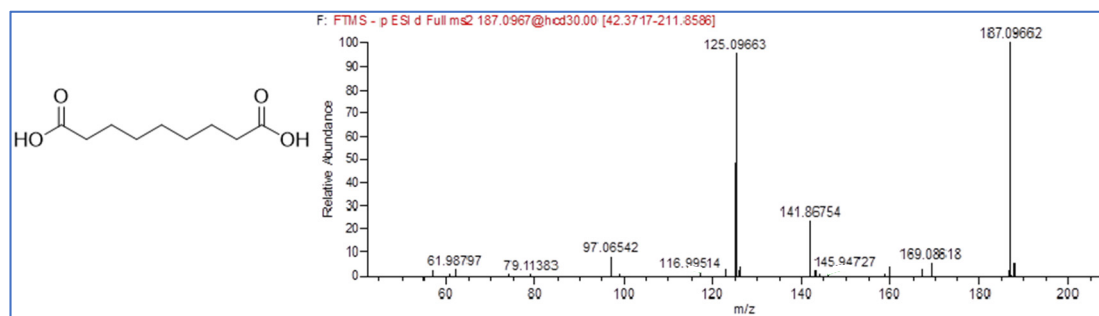

Compound 38

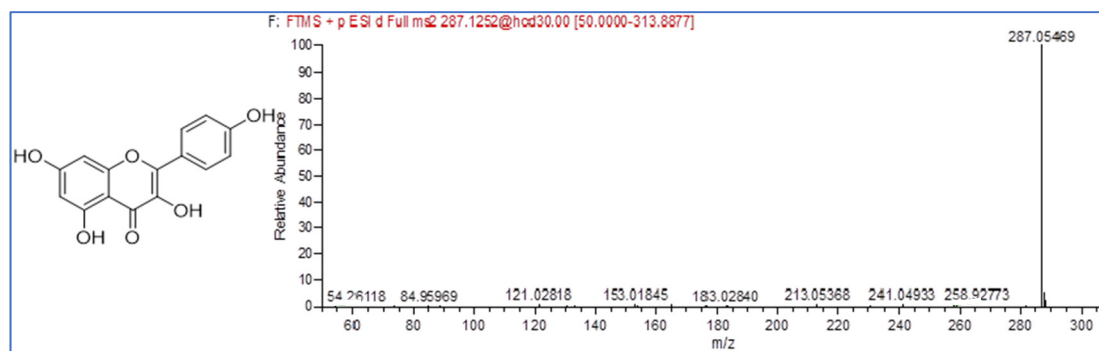

Compound 39

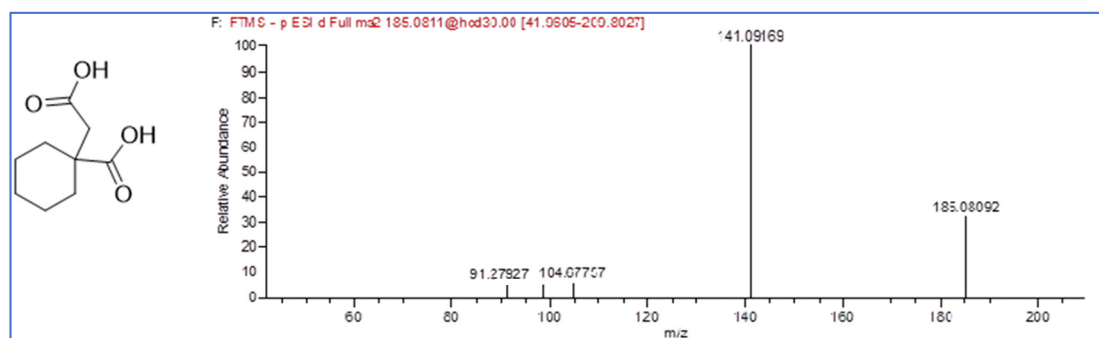

Compound 40

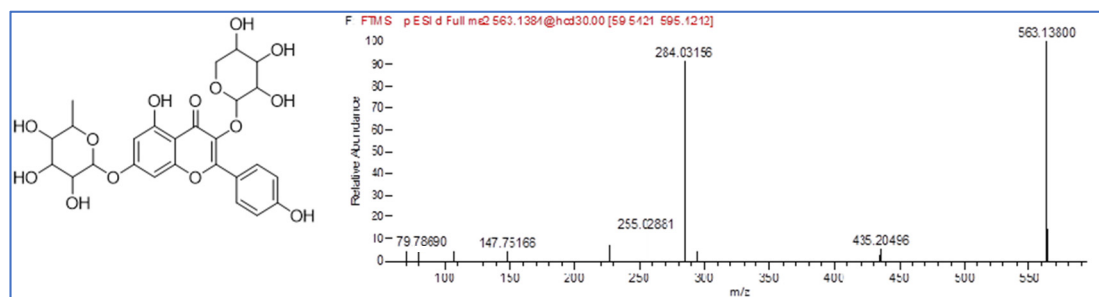

### Compound 41

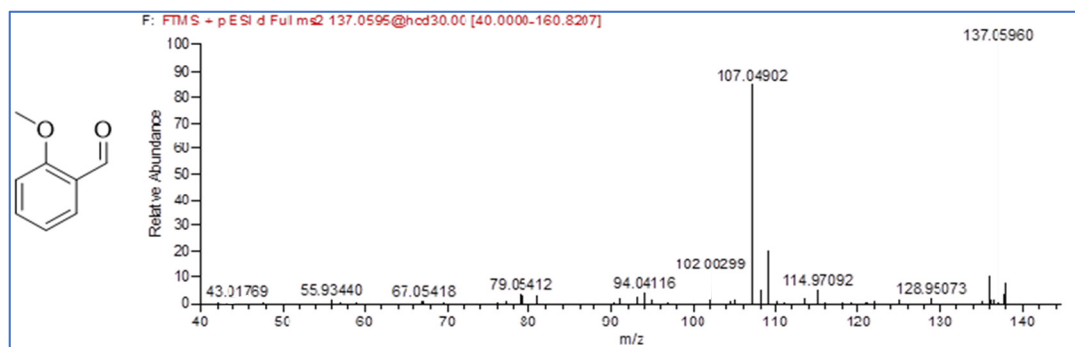

### Compound 42

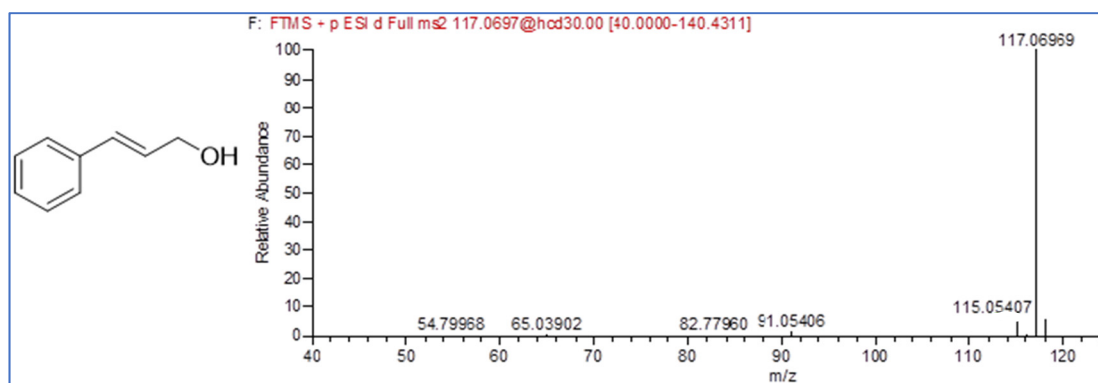

### Compound 43

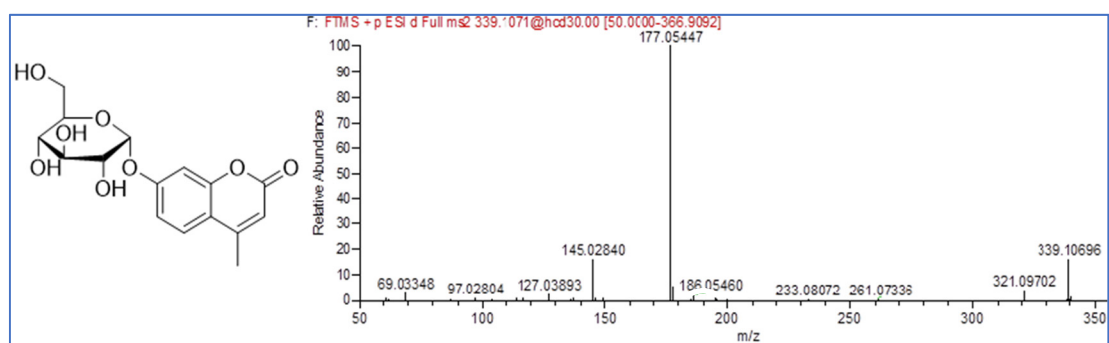

### Compound 44

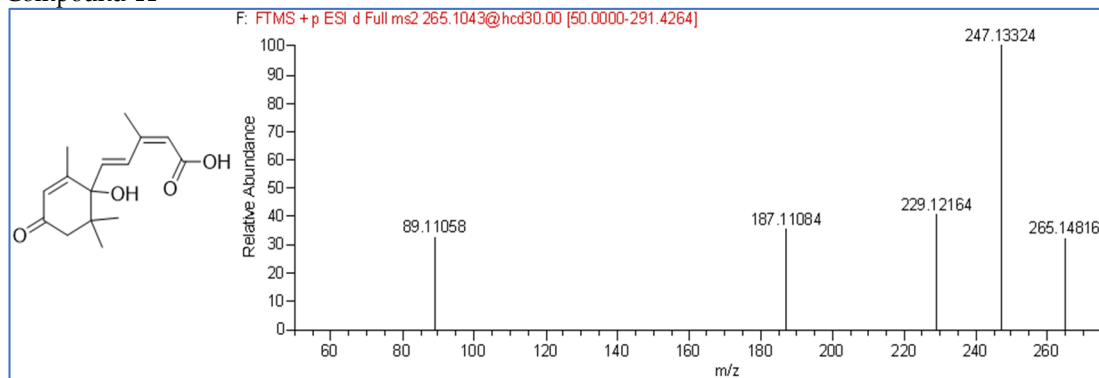

Compound 45

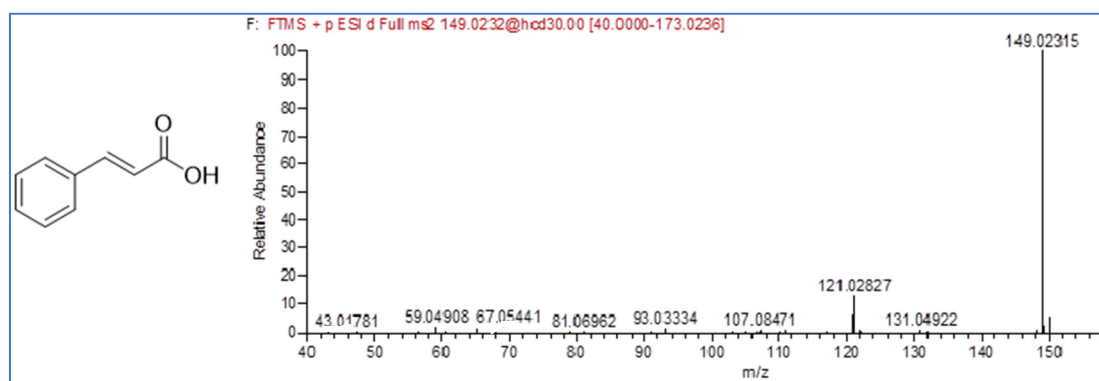

Compound 46

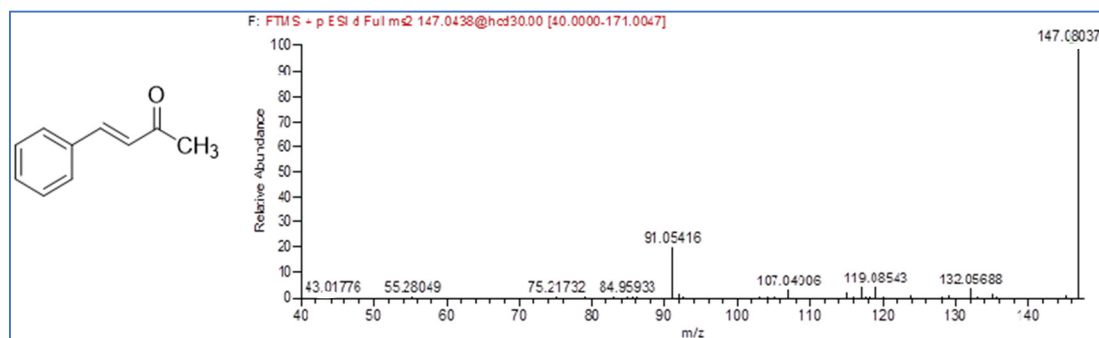

Compound 47

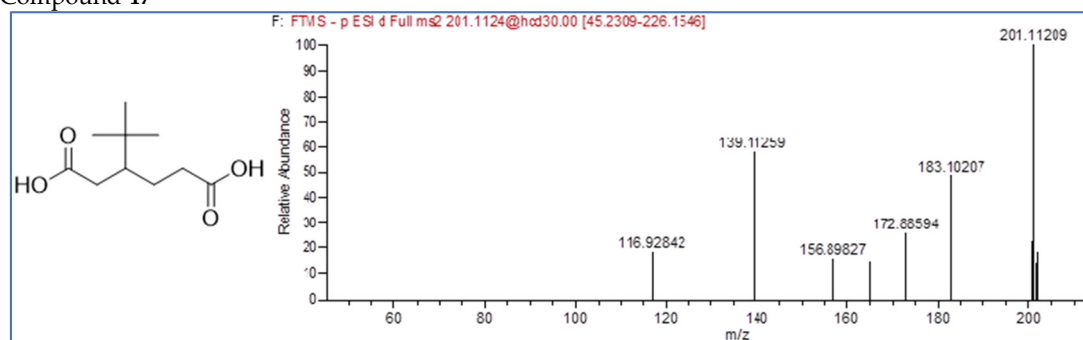

Compound 48

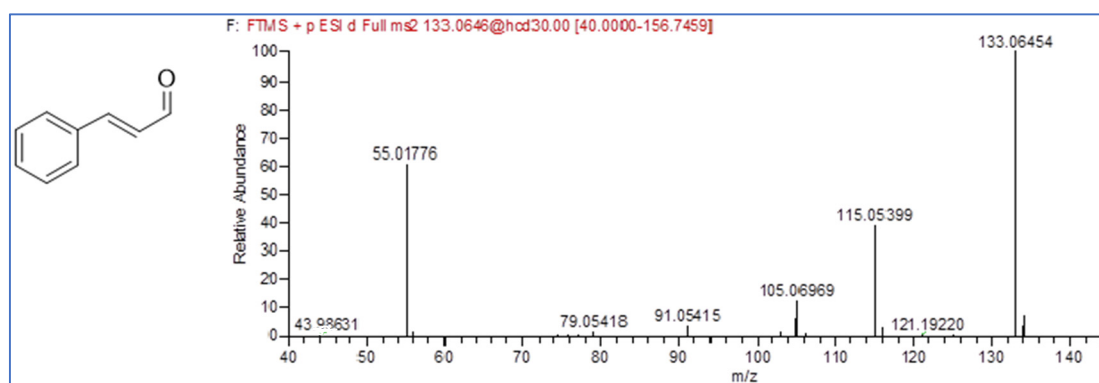

Compound 49

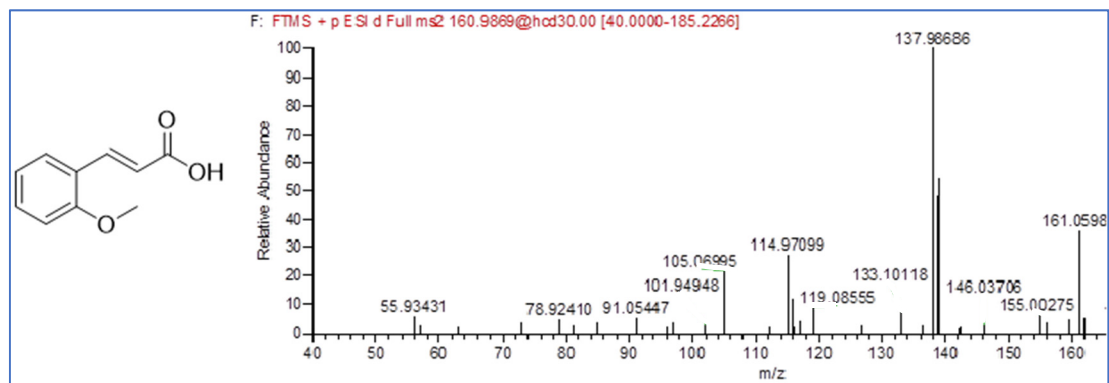

Compound 50

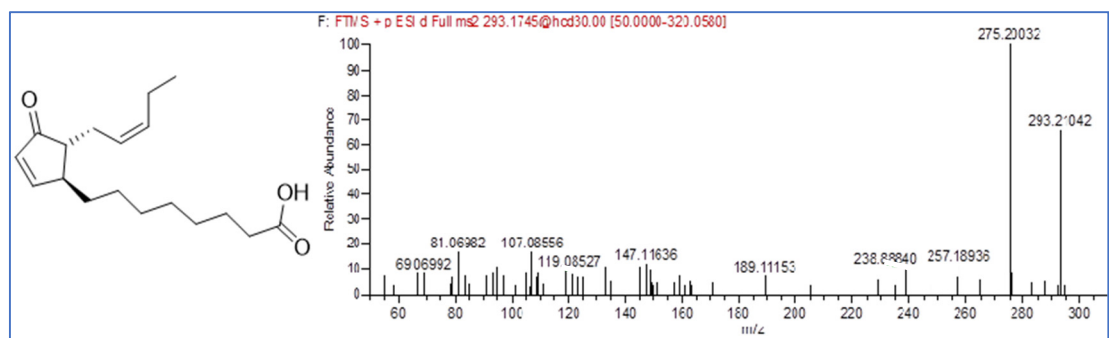

Compound 51

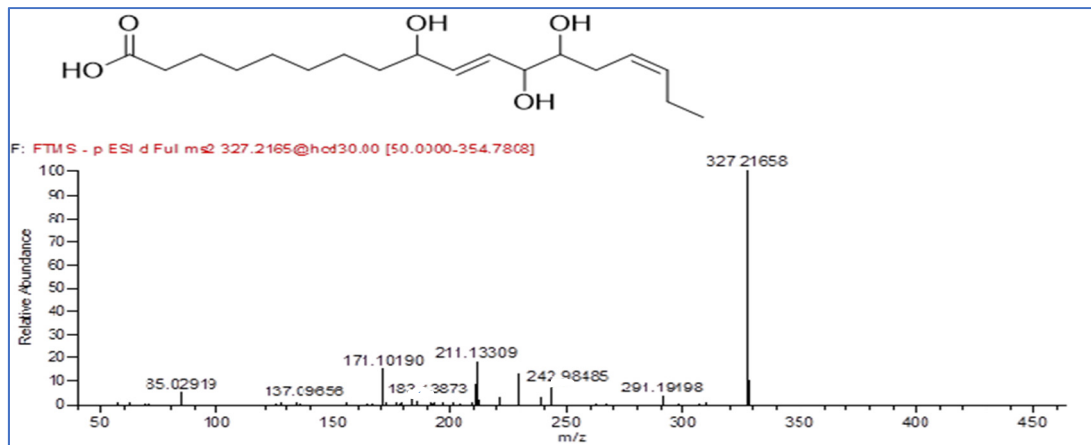

Compound 52

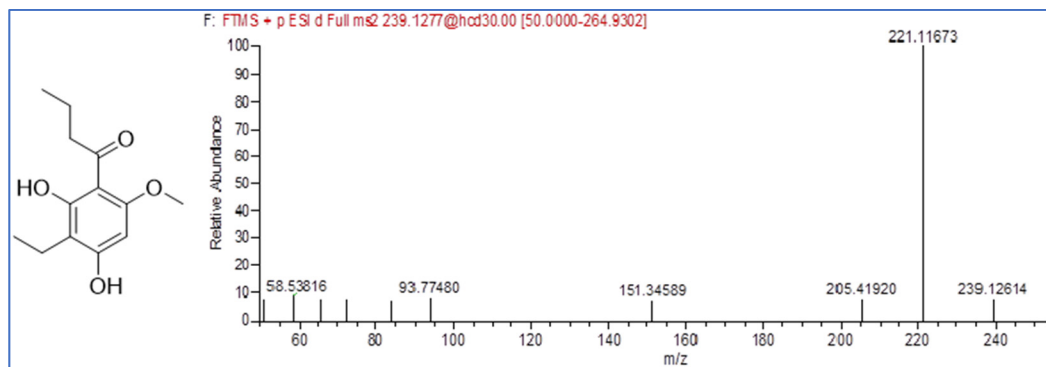

Compound 53

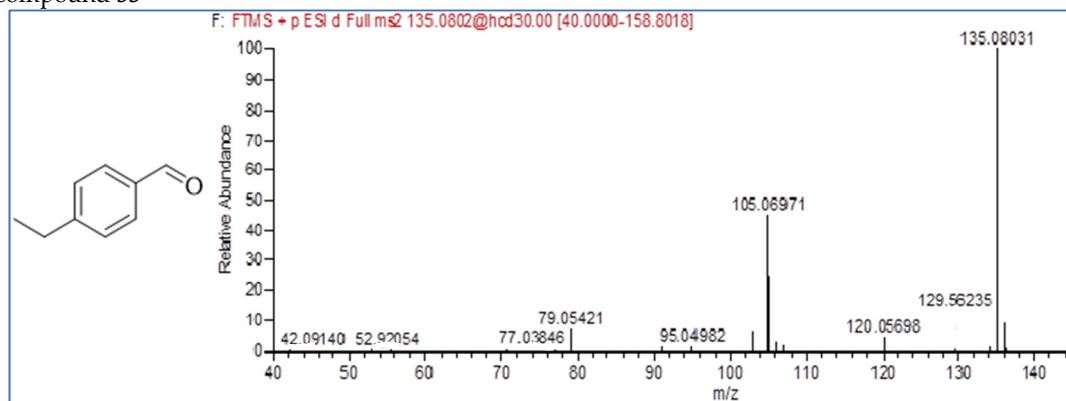

Compound 54

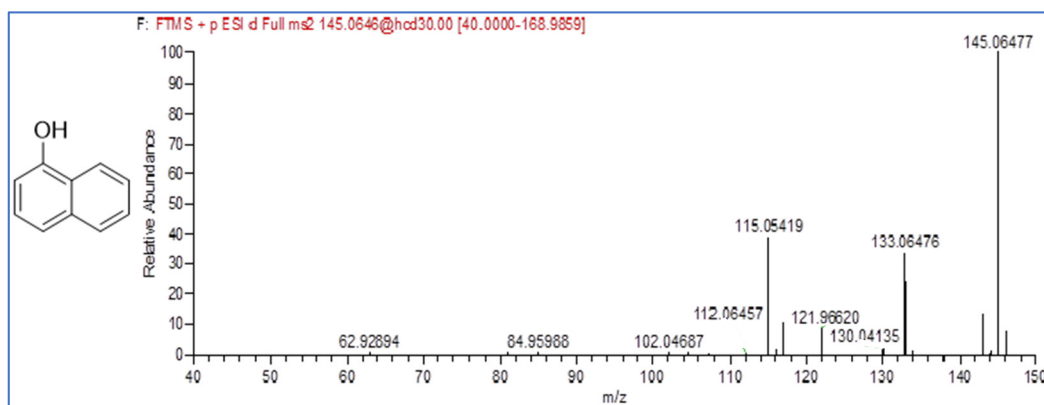

Compound 55

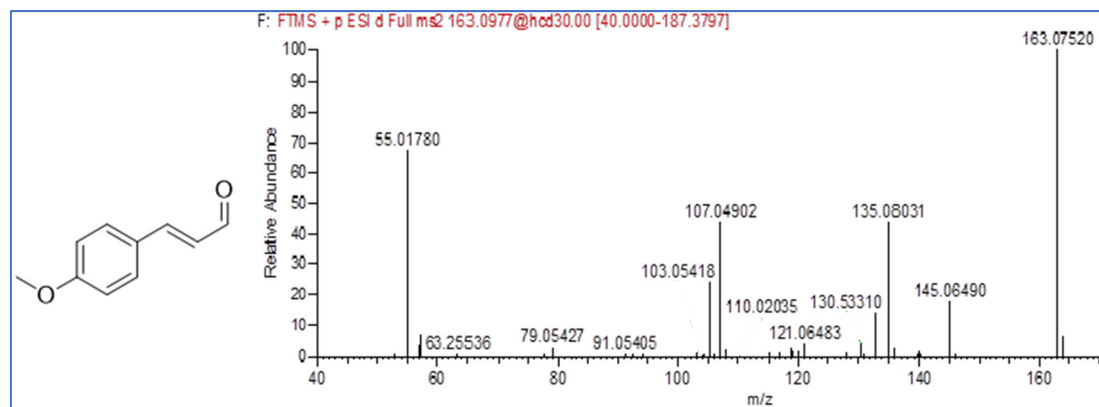

Compound 56

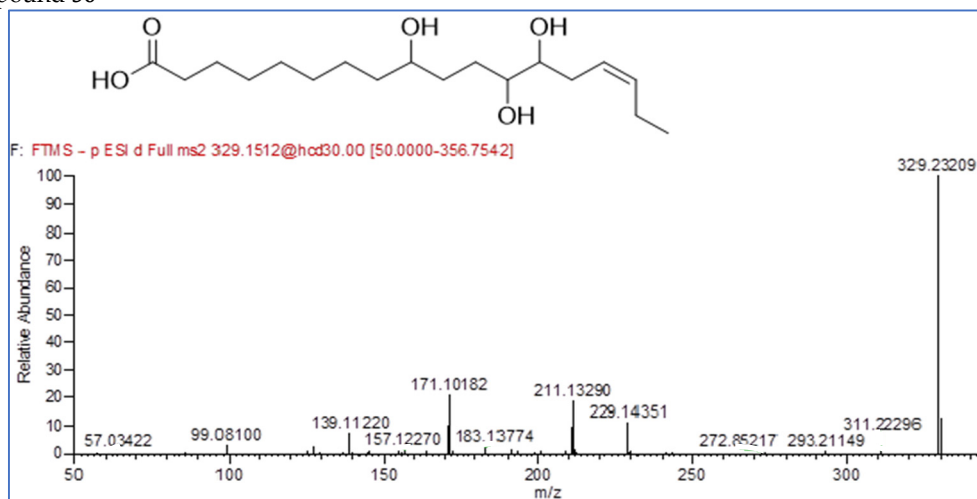

Compound 57

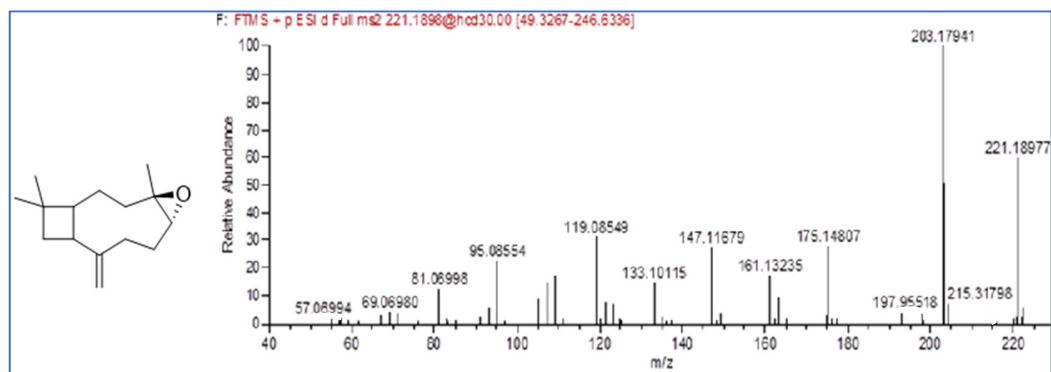

Compound 58

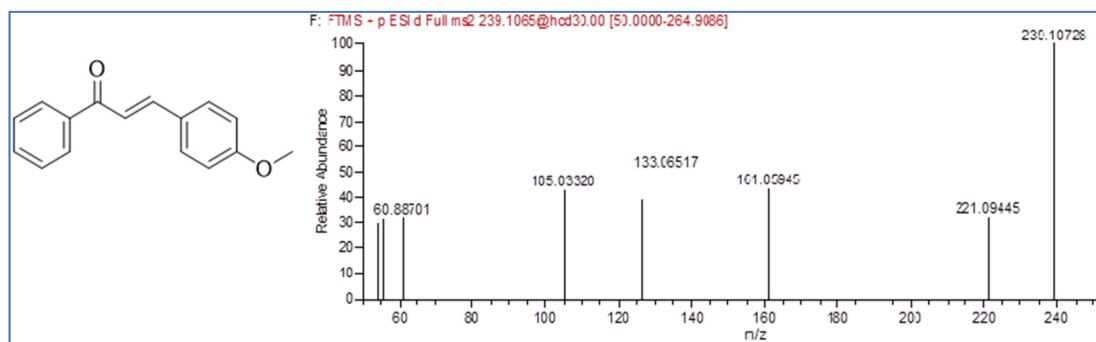



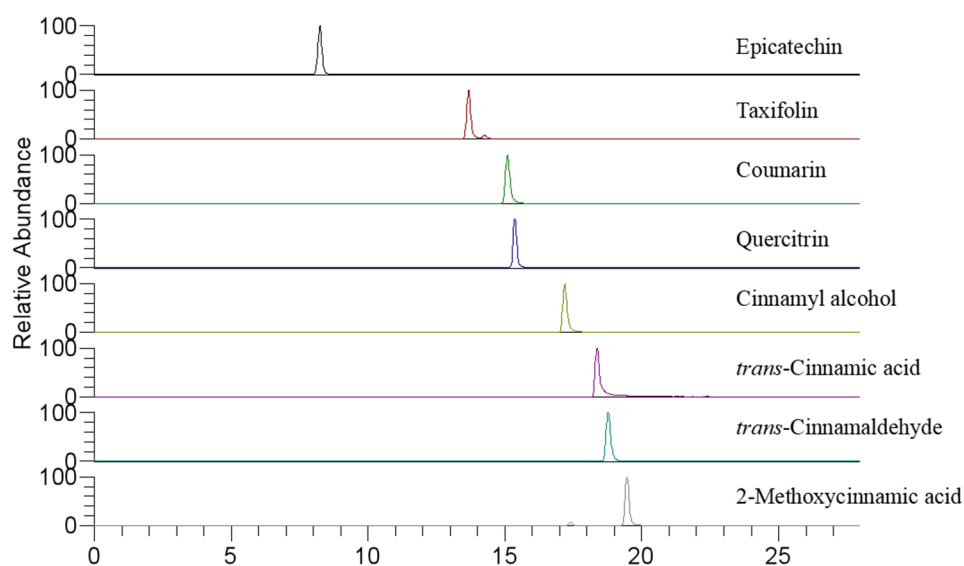

**Figure S4.** Extracted ion chromatograms (EIC) of 8 standards.

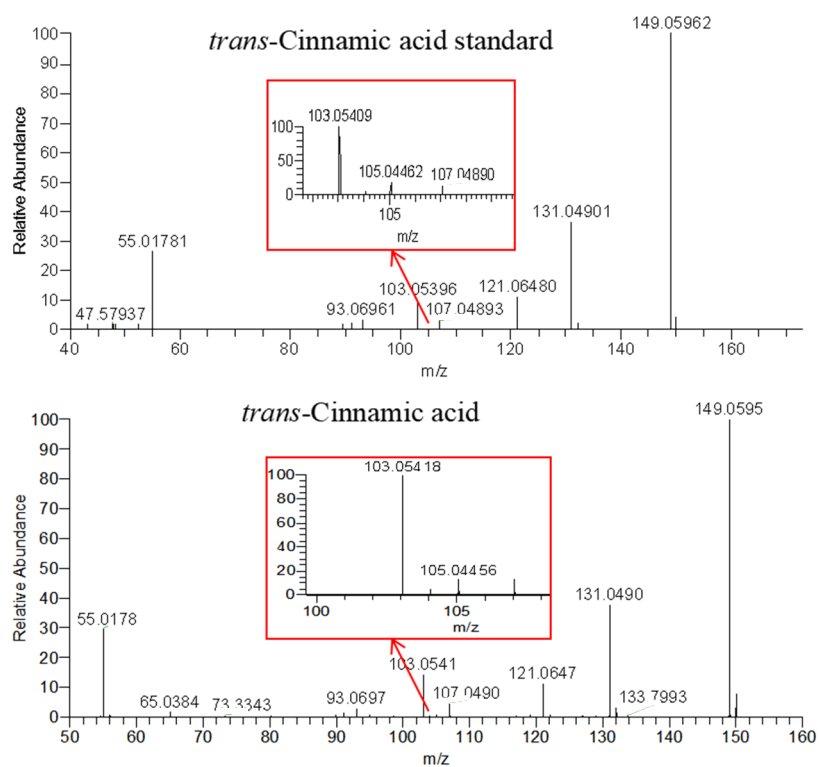

**Figure S5.** The  $MS^2$  spectrum of *trans*-cinnamic acid.

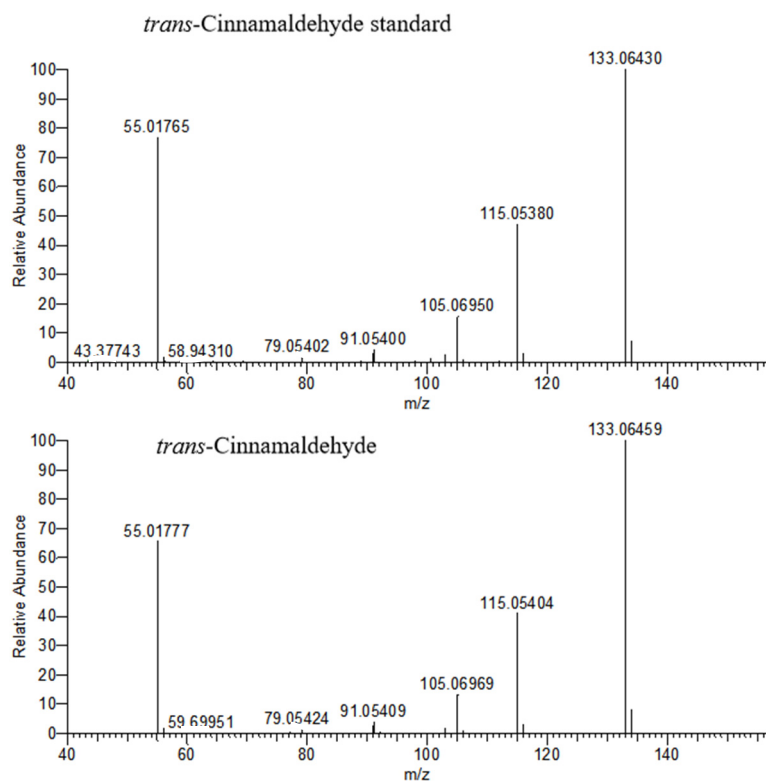

**Figure S6.** The MS<sup>2</sup> spectrum of *trans*-cinnamaldehyde.

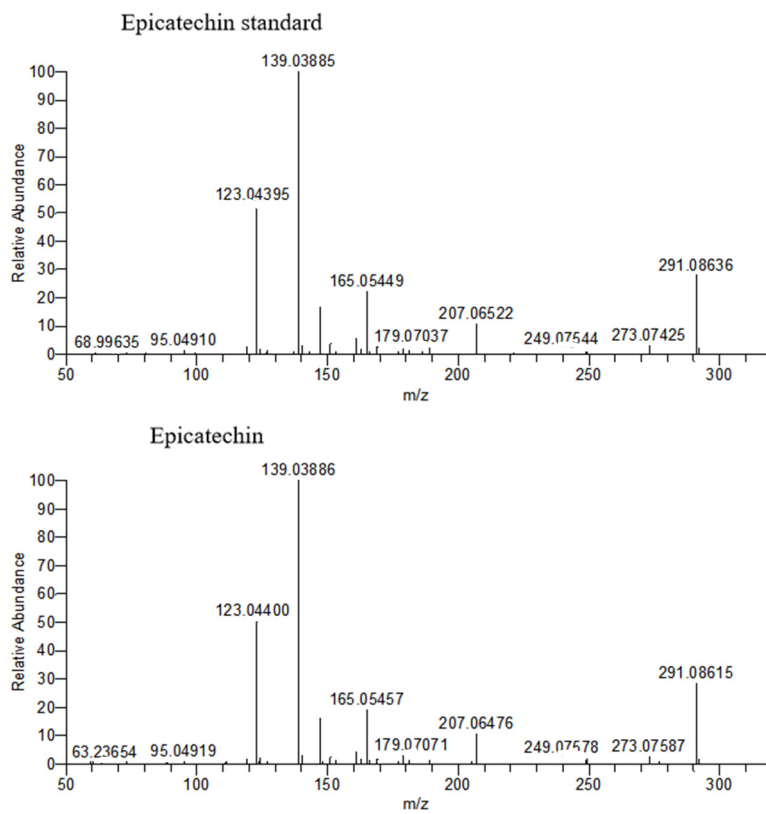

**Figure S7.** The MS<sup>2</sup> spectrum of epicatechin.

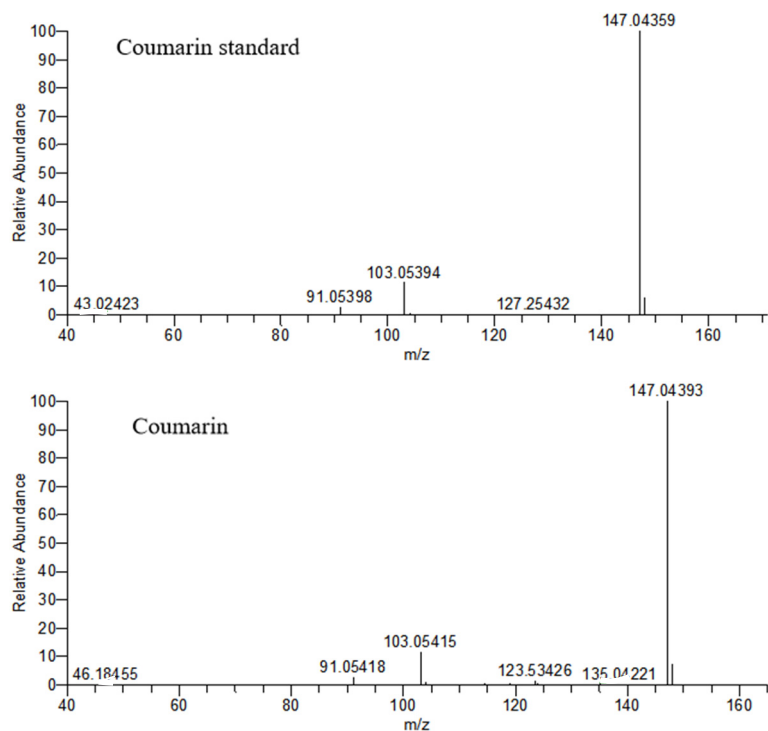

**Figure S8.** The MS<sup>2</sup> spectrum of of coumarin.

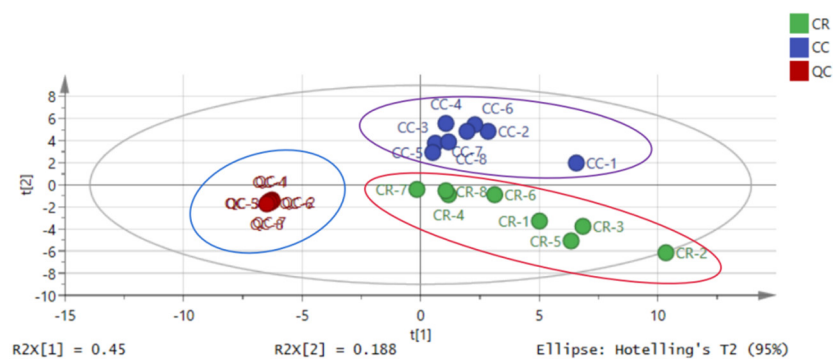

**Figure S9.** 2D PCA score scatter plot for CR, CC and QC after eliminating outliers.

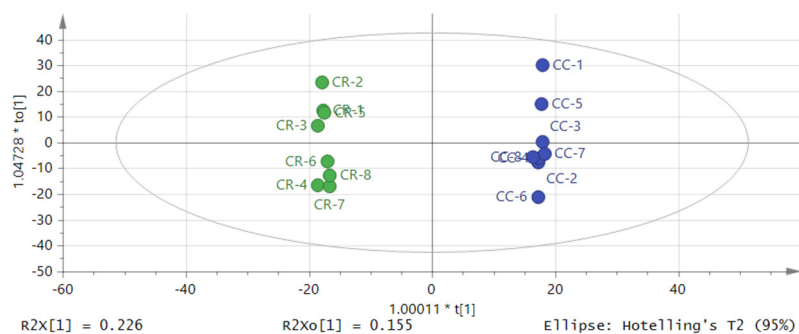

**Figure S10.** 2D OPLS-DA score scatter plot for CR and CC.

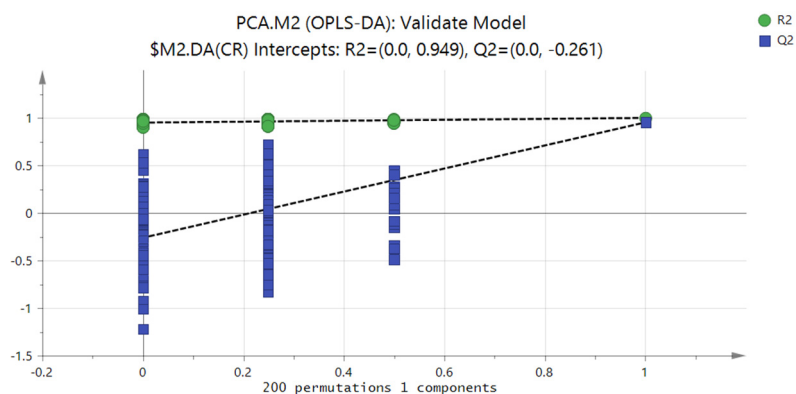

**Figure S11.** Validate model of OPLS-DA.

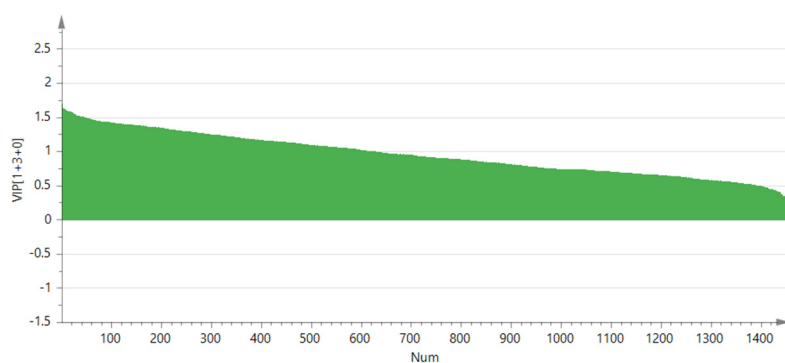

**Figure S12.** Variable importance of projection (VIP) plot of the OPLS-DA.

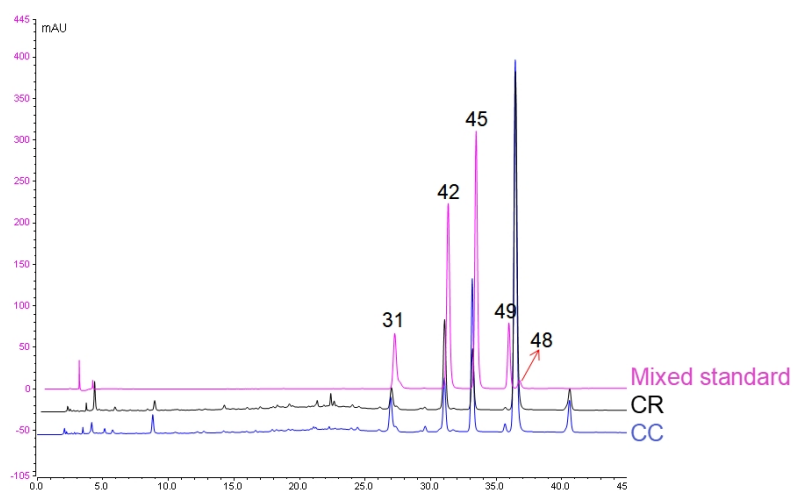

**Figure S13.** HPLC chromatograms for quantitative analyses. **31:** Coumarin, **42:** Cinnamyl alcohol, **45:** *trans*-Cinnamic acid, **49:** 2-Methoxycinnamic acid, **48:** *trans*-Cinnamaldehyde

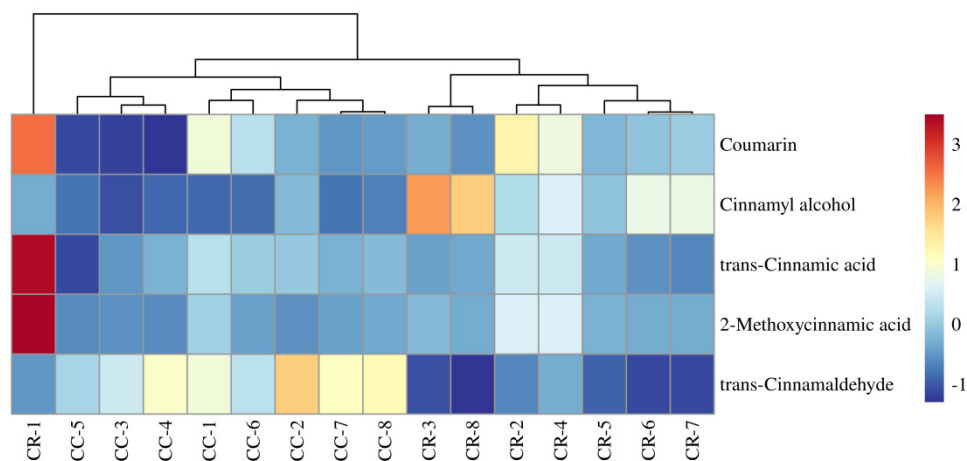

**Figure S14.** Dendrograms of hierarchical cluster analysis (HCA) for CR and CC.

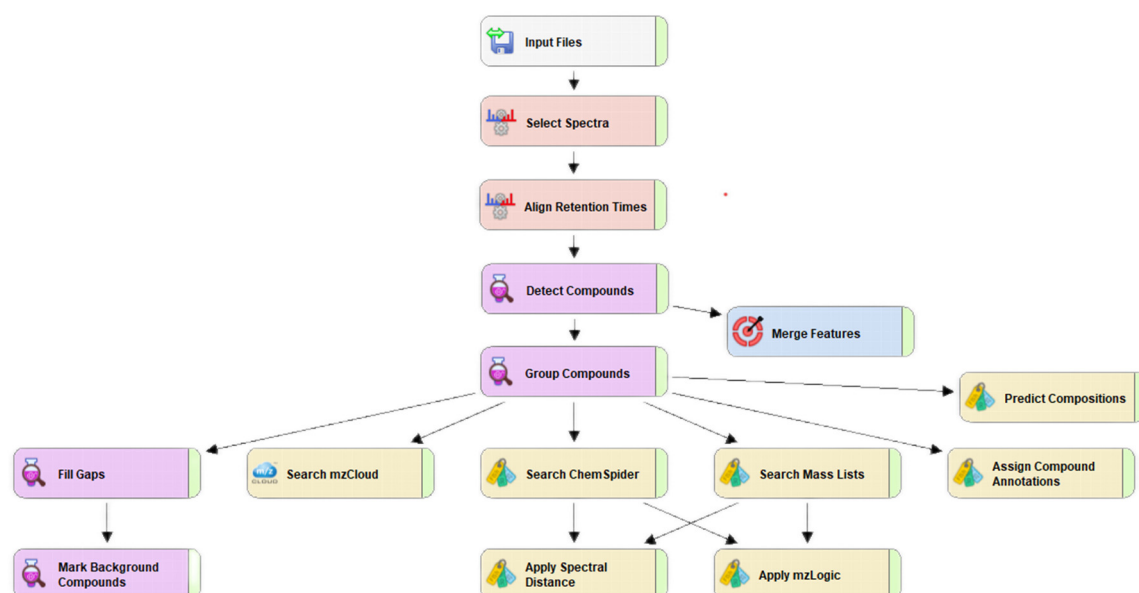

**Figure S15.** The workflow of compound screening with Compound Discoverer 3.2.

**Table S1.** Optimization of the LC-MS conditions

| Condition                                             | The total ion chromatogram of CR | Condition                                           | The total ion chromatogram of CR |
|-------------------------------------------------------|----------------------------------|-----------------------------------------------------|----------------------------------|
| Methanol/aqueous formic acid                          |                                  | Acetonitrile/aqueous formic acid                    |                                  |
| Waters Acquity UPLC BEH C18 (2.1 mm × 100 mm, 1.7 μm) |                                  | HYPERSILGOLD Vanquish C18 (2.1 mm × 100 mm, 1.9 μm) |                                  |
| column temperature was set at 35 °C                   |                                  | column temperature was set at 25 °C                 |                                  |
| vaporizer temperature was 320 °C                      |                                  | vaporizer temperature was 350 °C                    |                                  |
| the spray voltage was 3.8 kV(+)                       |                                  | the spray voltage was 3.5 kV(+)                     |                                  |

**Table S2.** Compound information with VIP>1.

| No. | Name                                                                                                 | VIP     | Fold change <sup>a</sup> | P-value <sup>b</sup> |
|-----|------------------------------------------------------------------------------------------------------|---------|--------------------------|----------------------|
| 3   | Gentisic acid                                                                                        | 1.60199 | -0.93                    | 0.0100               |
| 46  | 4-Phenyl-3-buten-2-one                                                                               | 1.55590 | 3.28                     | 0.0001               |
| 55  | 4-Methoxycinnamaldehyde                                                                              | 1.51806 | /                        | 0.4002               |
| 24  | 3-Oxoindane-1-carboxylic acid                                                                        | 1.50622 | 2.93                     | 0.0001               |
| 53  | 4-Ethylbenzaldehyde                                                                                  | 1.48790 | Specific in CR           | 0.0002               |
| 58  | 4-Methoxychalcone                                                                                    | 1.44618 | 3.26                     | 0.0005               |
| 8   | Citrinin                                                                                             | 1.44300 | Specific in CC           | 0.0002               |
| 1   | Gentisic acid 5-O-glucoside                                                                          | 1.39626 | 1.96                     | 0.0010               |
| 48  | <i>trans</i> -Cinnamaldehyde                                                                         | 1.38744 | -1.22                    | 0.0003               |
| 42  | Cinnamyl alcohol                                                                                     | 1.38222 | 1.88                     | 0.0008               |
| 43  | 4-Methylumbelliferyl- $\alpha$ -D-glucopyranoside                                                    | 1.34671 | /                        | 0.1463               |
| 40  | Kaempferol 3-O- $\alpha$ -L-arabinopyranosyl<br>-7-O- $\alpha$ -L-rhamnopyranoside                   | 1.29033 | 7.41                     | 0.0055               |
| 41  | 2-Methoxybenzaldehyde                                                                                | 1.23925 | Specific in CR           | 0.0258               |
| 38  | Kaempferol                                                                                           | 1.23917 | 3.21                     | 0.0116               |
| 34  | Graveobioside A                                                                                      | 1.22572 | 3.48                     | 0.0114               |
| 5   | Catechol                                                                                             | 1.22299 | -0.67                    | 0.0231               |
| 16  | 4-Acetyl-3-hydroxy-5-methylphenyl $\beta$ -D-glucopyranoside                                         | 1.21275 | -1.55                    | 0.0067               |
| 17  | Picconioside B                                                                                       | 1.21051 | -2.24                    | 0.0038               |
| 45  | <i>trans</i> -Cinnamic acid                                                                          | 1.20494 | -1.16                    | 0.0065               |
| 26  | 2-(4-hydroxyphenyl)-7-((3,4,5-trihydroxy-6-(hydroxymethyl)tetrahydro-2H-pyran-2-yl)oxy)chroman-4-one | 1.17656 | Specific in CC           | 0.0191               |
| 32  | Quercetin                                                                                            | 1.16950 | Specific in CR           | 0.0219               |
| 31  | Coumarin                                                                                             | 1.16629 | 1.15                     | 0.0411               |
| 44  | ( $\pm$ )-Absciscic acid                                                                             | 1.13767 | /                        | 0.0797               |
| 27  | Quercetin-3 $\beta$ -D-glucoside                                                                     | 1.13751 | 2.81                     | 0.0293               |
| 33  | Quercitrin                                                                                           | 1.13418 | Specific in CR           | 0.0296               |
| 36  | Yucalexin P-17                                                                                       | 1.12735 | Specific in CC           | 0.0126               |
| 7   | Salicylic acid                                                                                       | 1.12588 | /                        | 0.2768               |
| 49  | 2-Methoxycinnamic acid                                                                               | 1.11565 | /                        | 0.1049               |
| 2   | Isovanillic acid                                                                                     | 1.08152 | -0.38                    | 0.0374               |
| 22  | (-)-Lyoniresinol                                                                                     | 1.07830 | /                        | 0.1095               |
| 19  | Taxifolin                                                                                            | 1.07764 | Specific in CR           | 0.0295               |
| 11  | Epicatechin                                                                                          | 1.05657 | /                        | 0.1232               |
| 6   | Neochlorogenic acid                                                                                  | 1.04831 | /                        | 0.0644               |
| 14  | Catechin                                                                                             | 1.02725 | /                        | 0.1559               |
| 35  | Libertellenone B                                                                                     | 1.00161 | -0.98                    | 0.0497               |

<sup>a</sup> Fold change=log<sub>2</sub> (A<sub>CR</sub>/A<sub>CC</sub>). A<sub>CR</sub> and A<sub>CC</sub> represent the peak areas of the compounds in CR and CC. A positive value indicated that the expression of compound in CR was higher than that in CC, while a negative value indicated that the expression of compound in CR was lower than that in CC.

<sup>b</sup> P-value < 0.05 was significant.

**Table S3.** Results of recovery rate.

| NO. | Name                         | Original sample/ug | Add/ug  | Found/ug | Recovery % | Mean %  | RSD % |
|-----|------------------------------|--------------------|---------|----------|------------|---------|-------|
| 31  | Coumarin                     | 0.7071             | 73.5840 | 1.4641   | 104.69%    | 100.09% | 2.42% |
|     |                              | 0.7071             | 73.5840 | 1.4173   | 98.21%     |         |       |
|     |                              | 0.7071             | 73.5840 | 1.4153   | 97.93%     |         |       |
|     |                              | 0.7071             | 73.5840 | 1.4358   | 100.77%    |         |       |
|     |                              | 0.7071             | 73.5840 | 1.4328   | 100.36%    |         |       |
| 42  | Cinnamyl alcohol             | 0.0366             | 0.0373  | 0.0724   | 95.96%     | 98.07%  | 2.77% |
|     |                              | 0.0366             | 0.0373  | 0.0728   | 97.13%     |         |       |
|     |                              | 0.0366             | 0.0373  | 0.0718   | 94.50%     |         |       |
|     |                              | 0.0366             | 0.0373  | 0.0743   | 101.02%    |         |       |
|     |                              | 0.0366             | 0.0373  | 0.0734   | 98.59%     |         |       |
| 45  | <i>trans</i> -Cinnamic acid  | 0.8004             | 0.7867  | 1.5520   | 95.53%     | 95.11%  | 2.09% |
|     |                              | 0.8004             | 0.7867  | 1.5443   | 94.56%     |         |       |
|     |                              | 0.8004             | 0.7867  | 1.5460   | 94.77%     |         |       |
|     |                              | 0.8004             | 0.7867  | 1.5602   | 96.58%     |         |       |
|     |                              | 0.8004             | 0.7867  | 1.5222   | 91.75%     |         |       |
| 49  | 2-Methoxy cinnamic acid      | 0.0080             | 0.00798 | 0.0158   | 98.00%     | 98.30%  | 2.23% |
|     |                              | 0.0080             | 0.00798 | 0.0160   | 99.63%     |         |       |
|     |                              | 0.0080             | 0.00798 | 0.0155   | 94.18%     |         |       |
|     |                              | 0.0080             | 0.00798 | 0.0158   | 98.15%     |         |       |
|     |                              | 0.0080             | 0.00798 | 0.0160   | 100.14%    |         |       |
| 48  | <i>trans</i> -Cinnamaldehyde | 23.2100            | 22.8000 | 45.1864  | 96.39%     | 97.36%  | 3.43% |
|     |                              | 23.2100            | 22.8000 | 46.2753  | 101.16%    |         |       |
|     |                              | 23.2100            | 22.8000 | 45.2955  | 96.87%     |         |       |
|     |                              | 23.2100            | 22.8000 | 44.2427  | 92.25%     |         |       |
|     |                              | 23.2100            | 22.8000 | 45.2077  | 96.48%     |         |       |

Table S4. Molecular docking fraction.

| NO. | Fold change <sup>a</sup> | Name                                                                                                     | -CDOCKER INTERACTION ENERGY/ kJ.mol <sup>-1</sup> |               |         |         |
|-----|--------------------------|----------------------------------------------------------------------------------------------------------|---------------------------------------------------|---------------|---------|---------|
|     |                          |                                                                                                          | HbA1c                                             | PGC1 $\alpha$ | SIRT3   | AMPK    |
| 1   | 1.96                     | Gentisic acid 5-O- glucoside                                                                             | 43.8038                                           | 67.0292       | /       | 38.5316 |
| 2   | -0.38                    | Isovanillic acid                                                                                         | 23.2639                                           | 35.9152       | 26.4249 | 22.5498 |
| 3   | -0.93                    | Gentisic acid                                                                                            | 25.395                                            | 36.1031       | 23.8157 | 20.9892 |
| 5   | -0.67                    | Catechol                                                                                                 | 16.6196                                           | 25.7563       | 18.3868 | 17.6189 |
| 8   | Specific in CC           | Citrinin                                                                                                 | 28.8092                                           | 52.3062       | /       | 39.842  |
| 16  | -1.55                    | 4-Acetyl-3-hydroxy-5-methylphenyl<br>$\beta$ -D-glucopyranoside                                          | 43.7324                                           | 64.7307       | /       | 45.1652 |
| 17  | -2.24                    | Picconioside B                                                                                           | 62.5016                                           | /             | /       | 50.7858 |
| 19  | Specific in CR           | Taxifolin                                                                                                | 39.2912                                           | 60.4347       | /       | 49.8092 |
| 24  | 2.93                     | Lyoniside                                                                                                | 21.3959                                           | 36.4075       | 27.7012 | 23.9108 |
| 26  | Specific in CC           | 2-(4-Hydroxyphenyl)-7-((3,4,5-trihydroxy-6-(hydroxymethyl) tetrahydro-2H- pyran-2-yl) oxy) chroman-4-one | 53.7767                                           | 46.6389       | /       | 44.2027 |
| 27  | 2.81                     | 2-[1-(2H-1, 3-Benzodioxol-5-yl)propan-2-yl]                                                              | 52.3853                                           | /             | /       | 56.3881 |
| 31  | 1.15                     | Coumarin                                                                                                 | 17.7063                                           | 27.0471       | 18.5035 | 14.3744 |
| 32  | Specific in CR           | Quercetin                                                                                                | 35.5995                                           | 66.1113       | /       | 53.0311 |
| 33  | Specific in CR           | Quercitrin                                                                                               | 48.2373                                           | 28.2954       | /       | 63.6781 |
| 34  | 3.48                     | Graveobioside A                                                                                          | 63.679                                            | /             | /       | 62.8879 |
| 35  | -0.98                    | Libertellenone B                                                                                         | 32.9261                                           | 36.9579       | /       | 41.8519 |
| 36  | Specific in CC           | Yucalexin P-17                                                                                           | 35.2668                                           | 44.4972       | /       | 28.6512 |
| 40  | 7.41                     | Kaempferol 3-O- $\alpha$ -L-arabinopyranosyl-7-O- $\alpha$ -L-rhamnopyranoside                           | 64.5903                                           | /             | /       | 66.4067 |
| 41  | Specific in CR           | 2-Methoxy benzaldehyde                                                                                   | 23.2034                                           | 28.5392       | 19.1136 | 14.6854 |
| 42  | 1.88                     | Cinnamyl alcohol                                                                                         | 21.9571                                           | 26.9709       | 24.9043 | 21.6532 |
| 45  | -1.16                    | <i>trans</i> -Cinnamic acid                                                                              | 18.5375                                           | 37.4825       | 25.3821 | 20.5352 |
| 46  | 3.28                     | 4-Phenyl-3-buten-2-one                                                                                   | 20.6405                                           | 27.6936       | 23.658  | 16.5148 |
| 48  | -1.22                    | <i>trans</i> -Cinnamaldehyde                                                                             | 18.8605                                           | 27.4942       | 22.3644 | 18.7263 |
| 49  | 1.22                     | 2-Methoxycinnamic acid                                                                                   | 20.0461                                           | 26.8977       | 23.5866 | 15.9781 |
| 53  | Specific in CR           | 4-Ethylbenzaldehyde                                                                                      | 17.9064                                           | 27.6039       | 23.2434 | 16.3396 |
| 58  | 3.26                     | 4-Methoxychalcone                                                                                        | 30.8117                                           | 35.4958       | /       | 27.9932 |

<sup>a</sup>Fold change=log<sub>2</sub> (A<sub>CR</sub>/A<sub>CC</sub>). A<sub>CR</sub> and A<sub>CC</sub> represent the peak areas of the compounds in CR and CC. A positive value indicated that the expression of compound in CR was higher than that in CC, while a negative value indicated that the expression of compound in CR was lower than that in CC.

**Table S5.** Information on 8 batches of CR and CC.

| No.  | Origins   | Sample sources                                                         | Collection times | Voucher specimen No. |
|------|-----------|------------------------------------------------------------------------|------------------|----------------------|
| CR-1 | Guangxi   | Kangmei pharmaceutical Bozhou Huatuo traditional Chinese medicine city | 2020.07          | 20210910-001         |
| CR-2 | Guangxi   | Henan Zhang Zhongjing Pharmacy Co., Ltd Zhengzhou City Store           | 2019.08          | 20210910-002         |
| CR-3 | Guangxi   | Wuzhou city, Guangxi                                                   | 2021.08          | 20210910-003         |
| CR-4 | Guangxi   | Kangmei pharmaceutical Bozhou Huatuo Traditional Chinese medicine city | 2021.08          | 20210910-004         |
| CR-5 | Guangxi   | Henan Zhang Zhongjing Pharmacy Co., Ltd Zhengzhou City Store           | 2019.08          | 20210910-005         |
| CR-6 | Guangdong | Zhaoqing, Guangdong                                                    | 2021.09          | 20210910-006         |
| CR-7 | Guangdong | Zhongtang town, Dongguan city, Guangdong                               | 2021.06          | 20210910-007         |
| CR-8 | Sichuan   | Kangmei pharmaceutical Bozhou Huatuo traditional Chinese medicine city | 2021.08          | 20210910-008         |
| CC-1 | Guangxi   | Kangmei pharmaceutical Bozhou Huatuo traditional Chinese medicine city | 2021.08          | 20210911-001         |
| CC-2 | Guangxi   | Kangmei pharmaceutical Bozhou Huatuo traditional Chinese medicine city | 2022.08          | 20210911-002         |
| CC-3 | Guangxi   | Guangxi                                                                | 2021.09          | 20210911-003         |
| CC-4 | Guangdong | Dongguan, Guangdong province                                           | 2021.09          | 20210911-004         |
| CC-5 | Guangxi   | Anhui Bozhou economic development zone                                 | 2021.09          | 20210911-005         |
| CC-6 | Guangxi   | Henan Zhang Zhongjing Pharmacy Co., Ltd Zhengzhou City Store           | 2019.08          | 20210911-006         |
| CC-7 | Guangxi   | Kangmei pharmaceutical Bozhou Huatuo traditional Chinese medicine city | 2021.08          | 20210911-007         |
| CC-8 | Sichuan   | Kangmei pharmaceutical Bozhou Huatuo traditional Chinese medicine city | 2021.08          | 20210911-008         |

## Identification of other constituents of CR and CC

### S1. Identification of other phenylpropanoids and phenolic acids

The diagnostic ions at  $m/z$  163/165, 151/153 and 135/137 were indicators of phenylpropanoids and phenolic acids in literature [23,67]. Besides, we found that fragment ions at  $m/z$  105/107 and 123/125 also could be diagnostic ions by statistical analyses [23,67].

Compounds **1**, **2**, **3**, **4**, **15** and **18** were filtered by  $m/z$  151 or 153. Compound **2** showed a precursor ion at  $m/z$  167.0342  $[M-H]^-$ , which suggested a molecular formula of  $C_8H_8O_4$ , and showed the fragment ions at  $m/z$  151.0226  $[M-O]^-$  and  $m/z$  123.0449  $[M-COOH-H]^-$  that indicated the hydroxyl and carboxyl groups, thus compound **2** putatively was identified as isovanillic acid by the published literature [29] and database. Compound **4** possessed a molecular formula of  $C_8H_8O_4$  by a precursor ion at  $m/z$  199.0588  $[M+H]^+$ , and exhibited the fragment ions at  $m/z$  181.0495  $[M-OH+H]^+$ ,  $m/z$  163.1478  $[M-2H_2O+H]^+$  and  $m/z$  153.0764  $[M-OH-OCH_3+H]^+$ , thus compound **4** was tentatively identified as syringic acid by the published literature [35]. Compounds **15** and **18** had a same molecular formula of  $C_8H_8O_3$  by their same precursor ions at  $m/z$  153.0545  $[M+H]^+$ . However, compound **15** directly lost one carbonyl group to form an ion peak of  $m/z$  125.0595  $[M-CO+H]^+$  and compound **18** lost one carboxyl and methylene group and showed  $m/z$  95.0491  $[M-CO_2-CH_2+H]^+$ , thus compounds **15** and **18** were respectively presumed to be vanillin [39] and 2-anisic acid [68]. Compounds **1** and **3** with the molecular formulas of  $C_{13}H_{16}O_9$ , and  $C_7H_6O_4$  by the precursor ions at  $m/z$  315.0709  $[M+H]^+$  and 153.0187  $[M+H]^+$ , had the common fragment ions at  $m/z$  153.0185  $[M-C_6H_{10}O_5+H]^+$  or 153.0187  $[M+H]^+$ , and  $m/z$  109.0293  $[M-C_6H_{10}O_5-COOH+H]^+$  or  $m/z$  109.0288  $[M-COOH+H]^+$ , thus compounds **1** and **3** were tentatively identified as gentisic acid 5-O-glucoside and gentisic acid [35].

Compounds **9**, **41**, **45**, **46**, **48**, **49**, **52**, **53** and **55** were filtered by  $m/z$  105 or 107. Compound **46** possessed a molecular formula of  $C_{10}H_{10}O$  by the ion peak at  $m/z$  147.0803  $[M+H]^+$ , and also showed the fragment ions at  $m/z$  132.0567  $[M-CH_3+H]^+$ ,  $m/z$  107.0489  $[M-CH-CO+H]^+$  and  $m/z$  91.0541  $[M-C_3H_4O+H]^+$ , thus compound **46** was tentatively identified as 4-phenyl-3-buten-2-one [49]. Compound **49** produced the ion peak at  $m/z$  161.0596  $[M-H_2O+H]^+$ , indicating a molecular formula of  $C_{10}H_{10}O_3$ , and also showed the fragment ions at  $m/z$  133.1011  $[M-H_2O-CO+H]^+$ ,  $m/z$  119.0855  $[M-CHO-OCH_2+H]^+$  and  $m/z$  105.0698  $[M-COOH-CH+H]^+$ , thus compound **49** was putatively

identified as 2-methoxycinnamic acid [48]. Compound **52** with a molecular formula of  $C_{13}H_{18}O_4$  by  $m/z$  239.1275  $[M + H]^+$ , showed the signals at  $m/z$  205.1192  $[M - 2OH + H]^+$ ,  $m/z$  179.0705  $[M - C_2H_5 - OCH_3 + H]^+$ ,  $m/z$  151.0753  $[M - C_2H_5 - C_3H_7O + H]^+$ ,  $m/z$  107.0481  $[M - 2OH - 2OCH_3 - C_2H_4 - C_3H_3 + H]^+$  and  $m/z$  95.0861  $[M - OH - 2OCH_3 - C_2H_5 - C_4H_3O + H]^+$ , thus compound **52** was putatively identified as deoxyphomalone [50]. Compound **55** with a molecular formula of  $C_{10}H_{10}O_2$  by  $m/z$  163.0754  $[M + H]^+$ , and exhibited the ions at  $m/z$  135.0803  $[M - CO + H]^+$ ,  $m/z$  110.0203  $[M - C_3H_3O + H]^+$ ,  $m/z$  105.0699  $[M - CO - OCH_3 + H]^+$  and  $m/z$  79.0542  $[M - C_3H_3O - OCH_3 + H]^+$ , thus compound **55** was putatively identified as 4-methoxy cinnamaldehyde [46]. The cleavage of compounds **45** and **48** were shown in the manuscript.

Compounds **9** and **41** with a common molecular formula of  $C_8H_8O_2$  showed the similar fragment ions at  $m/z$  107, 93, 79. For example, compound **9** with  $[M + H]^+$  ions of  $m/z$  137.0596 produced an  $[M - OCH_2 + H]^+$  ion at  $m/z$  107.0490, an  $[M - CO - CH_3 + H]^+$  ion at  $m/z$  93.0590, and an  $[M - CO - OCH_3 + H]^+$  ion at  $m/z$  79.0543. Thus compounds **9** and **41** were tentatively identified as 4-methoxybenzaldehyde and 2-methoxybenzaldehyde [28]. Compound **53** produced  $m/z$  135.0803  $[M + H]^+$ , with a formula of  $C_9H_{10}O$ , and also showed  $m/z$  135.0803  $[M + H]^+$ ,  $m/z$  107.0490  $[M - CO + H]^+$ ,  $m/z$  105.0697  $[M - C_2H_6 + H]^+$  and  $m/z$  79.0542  $[M - C_2H_6 - CO + H]^+$ , thus compound **53** was presumed to be 4-ethylbenzaldehyde [52].

Compound **6** showed the precursor ion at  $m/z$  353.0886  $[M - H]^-$ , which indicated a formula of  $C_{16}H_{18}O_9$ , was tentatively identified as neochlorogenic acid [35], it produced similar fragment ions at  $m/z$  191.0550  $[M - C_9H_6O_3 - H]^-$ ,  $m/z$  179.0343  $[M - C_7H_{10}O_5 - H]^-$ ,  $m/z$  161.0237  $[M - C_7H_{10}O_5 - H_2O - H]^-$  and  $m/z$  135.0445  $[M - C_7H_{10}O_5 - CO_2 - H]^-$ . Compound **7** had the precursor ion at  $m/z$  137.0238  $[M - H]^-$ , with a formula of  $C_7H_6O_3$ , and also showed  $m/z$  119.0132  $[M - H_2O - H]^-$ ,  $m/z$  108.8992  $[M - CO - H]^-$  and  $m/z$  93.0343  $[M - COO - H]^-$ , thus compound **7** presumed to be vanillin salicylic acid [24].

Compound **16** had a molecule formula of  $C_{15}H_{20}O_8$  by  $m/z$  327.1073  $[M - H]^-$ , showed the fragment ions at  $m/z$  165.0548  $[M - C_6H_{10}O_5 - H]^-$ ,  $m/z$  147.0446  $[M - C_6H_{10}O_5 - H_2O - H]^-$  and  $m/z$  121.0653  $[M - C_6H_{10}O_5 - OH - CH_3 - CH_2 - OH]^-$ , therefore compound **16** were tentatively identified as 4-acetyl-3-hydroxy- 5-methylphenyl- $\beta$ -D-glucopyranoside [27]. Compound **21** produced a molecule formula of  $C_8H_{10}O$  by  $m/z$  121.0654  $[M - H]^-$  and  $m/z$  106.0419  $[M - CH_3 - H]^-$ , which tentatively identified compound **21** as 4-ethylphenol [44]. Compound **25** showed the ions at  $m/z$

165.0548  $[M - H]^-$ , which suggested a molecule formula of  $C_{15}H_{20}O_8$ , and showed  $m/z$  136.9315  $[M - OCH_3 - H]^-$  and  $m/z$  96.9597  $[M - C_2H_3O_2 - H]^-$ , hence compound **25** was tentatively identified as 3-methoxyphenylacetic acid by the published literature and database [69]. Compound **42** had a formula of  $C_9H_{10}O$ , and exhibited the ions at  $m/z$  117.0698  $[M - H_2O + H]^+$ , and  $m/z$  91.0540  $[M - C_2H_4O + H]^+$ , thus compound **42** was identified as cinnamyl alcohol [46].

## S2. Identification of other flavonoids

Two epicatechins **11** and **14** were filtered by  $m/z$  291 or 289 [23,67]. Compounds **11** and **14** showed a same molecular formulas  $C_{15}H_{14}O_6$  through their precursor ions at  $m/z$  291.0860  $[M + H]^+$  and  $m/z$  289.0703  $[M - H]^-$ , respectively. And their fragmentation behaviours and fragment ions were basically identical, thus compound **14** should be an isomer of **11** that was identified by the retention time of standard. Therefore, compound **14** were presumed to be catechin [70,71].

Three quercetins **27**, **32** and **33** were filtered by  $m/z$  303 or 301 [23,67]. Compounds **27**, **32** and **33** had the molecular formulas of  $C_{21}H_{20}O_{12}$ ,  $C_{15}H_{10}O_7$  and  $C_{21}H_{20}O_{11}$ , but showed the similar fragment ions at  $m/z$  257, 229. For example, compound **32** with  $[M + H]^+$  ions of  $m/z$  303.0496 produced an  $[M - CO - H_2O + H]^+$  ion at  $m/z$  257.0446 and an  $[M - 2CO - H_2O + H]^+$  ion at  $m/z$  229.0491, thus compound **32** was identified as quercetin by a reference standard. Compound **33** was presumed to be quercitrin by a neutral loss of rhamnose moiety at  $m/z$  303.0496  $[M + H - C_6H_9O_4]^+$  in the MS<sup>2</sup> spectrum, and compound **27** with a neutral loss of a glucose moiety  $m/z$  301.0338  $[M - H - C_6H_{10}O_5]^-$ , tentatively identified compound **27** as quercetin-3 $\beta$ -D-glucoside [34].

Two kaempferols **38** and **40** were filtered by  $m/z$  287 or 285 [23,67]. The molecular formula of compound **38** was  $C_{15}H_{10}O_6$  by its precursor ion at  $m/z$  287.0550  $[M + H]^+$ , and it has been identified as kaempferol by combining the mass fragments of literatures and standard. Compound **40** was presumed to be kaempferol 3-O- $\alpha$ -L-arabinopyranosyl-7-O- $\alpha$ -L-rhamnopyranoside [23,67, 70, 71]. It presented a formula of  $C_{26}H_{28}O_{14}$  and showed a neutral loss of a glucose moiety and an arabinopyranosyl moiety  $m/z$  284.0316  $[M - C_6H_8O_4 - C_5H_{10}O_4 - H]^-$ .

Two dihydroflavones **19** and **26** were identified. Compound **19** showed a precursor ion  $m/z$  305.0662  $[M + H]^+$  and its molecular formula was  $C_{15}H_{12}O_7$ , and also showed  $m/z$  287.0573  $[M - H_2O + H]^+$ ,  $m/z$  257.0591  $[M - CO - H_2O + H]^+$  and  $m/z$  153.0188  $[M - CO - C_7H_8O_2 + H]^+$ , thus compound **19** was putatively identified as taxifolin [12]. Compound **26** produced a precursor ion  $m/z$  417.1177  $[M +$

H]<sup>+</sup> that suggested a molecular formula of C<sub>21</sub>H<sub>22</sub>O<sub>9</sub>, and also showed a neutral loss of a glucose moiety  $m/z$  301.0338 [M – C<sub>6</sub>H<sub>10</sub>O<sub>5</sub> – H]<sup>–</sup> and 153.0187 [M – C<sub>6</sub>H<sub>10</sub>O<sub>5</sub> – CO – C<sub>7</sub>H<sub>6</sub>O<sub>2</sub> – H]<sup>–</sup>, thus compound **26** was putatively identified as 2-(4-hydroxyphenyl)-7-((3,4,5-trihydroxy-6-(hydroxymethyl) tetrahydro-2H-pyran-2 -yl) oxy) chroman-4-one [67, 12].

### S3. Identification of other coumarin

Compound **43** showed the similar fragmentation behaviours and fragment ions as **31**, but compound **43** had a molecular formula of C<sub>16</sub>H<sub>18</sub>O<sub>8</sub> by a precursor ion at  $m/z$  339.1075 [M + H]<sup>+</sup>, and showed a neutral loss of a glucose moiety and a CH<sub>3</sub> that formed  $m/z$  177.0546 [M + H – C<sub>6</sub>H<sub>10</sub>O<sub>5</sub>]<sup>+</sup> and  $m/z$  145.0284 [M – C<sub>6</sub>H<sub>10</sub>O<sub>5</sub> – CH<sub>3</sub> – OH + H]<sup>+</sup>, thus compound **43** was tentatively identified as 4-methylumbelliferyl- $\alpha$ -D- glucopyranoside by database.

### S4. Identification of other Lignans

Three lignans (**20**, **22** and **23**) were filtered by  $m/z$  419 or 420 [21]. Compounds **20**, **22** and **23** showed precursor ions  $m/z$  581.2209 [M – H]<sup>–</sup>,  $m/z$  419.1694 [M – H]<sup>–</sup> and 551.2105 [M – H]<sup>–</sup>, which suggested molecular formulas of C<sub>28</sub>H<sub>38</sub>O<sub>13</sub>, C<sub>22</sub>H<sub>28</sub>O<sub>8</sub> and C<sub>27</sub>H<sub>36</sub>O<sub>12</sub>, and showed the filtering ions at  $m/z$  419.1691 [M – C<sub>6</sub>H<sub>10</sub>O<sub>5</sub> – H]<sup>–</sup>,  $m/z$  419.1694 [M – H]<sup>–</sup> and  $m/z$  419.1650 [M – C<sub>5</sub>H<sub>10</sub>O<sub>4</sub> – H]<sup>–</sup> and showed the common ions at  $m/z$  373.1272 [M – C<sub>6</sub>H<sub>10</sub>O<sub>5</sub> – 3CH<sub>3</sub> – H]<sup>–</sup> and 359.1110 [M – C<sub>6</sub>H<sub>10</sub>O<sub>5</sub> – 4CH<sub>3</sub> – H]<sup>–</sup>, or  $m/z$  373.1277 [M – 3CH<sub>3</sub> – H]<sup>–</sup> and  $m/z$  359.1119 [M – 4CH<sub>3</sub> – H]<sup>–</sup>, or  $m/z$  373.1272 [M – C<sub>6</sub>H<sub>10</sub>O<sub>5</sub> – 3CH<sub>3</sub> – H]<sup>–</sup> and  $m/z$  359.1110 [M – C<sub>6</sub>H<sub>10</sub>O<sub>5</sub> – 4CH<sub>3</sub> – H]<sup>–</sup>, hence compounds **20**, **22** and **23** were tentatively identified as lyoniresinol-3a-O- $\beta$ -D-glucopyranosid, (-)-lyoniresinol and lyoniside [33,42].

Compound **28** had a molecular formula of C<sub>20</sub>H<sub>22</sub>O<sub>4</sub> by the ion peak at  $m/z$  327.1593 [M + H]<sup>+</sup>, and showed the fragment ions at  $m/z$  295.1328 [M – OCH<sub>2</sub> + H]<sup>+</sup> and  $m/z$  163.0753 [M – C<sub>10</sub>H<sub>12</sub>O<sub>2</sub> + H]<sup>+</sup>, thus compound **28** was tentatively identified as 2-[1-(2H-1, 3-benzodioxol-5-yl) propan-2-yl]-6-methoxy-4-(prop-2-en-1-yl) phenol [33,42].

### S5. Identification of terpenoids

A total of six terpenoids were discovered, including compounds **35**, **36**, **44**, **57**.

Compound **35** was tentatively identified as libertellenone B. It presented a formula of  $C_{20}H_{26}O_4$  and produced several main fragment ions at  $m/z$  331.1902  $[M + H]^+$ ,  $m/z$  313.1796  $[M - H_2O + H]^+$ ,  $m/z$  165.0911  $[M - C_{10}H_{14}O_2 + H]^+$  and  $m/z$  125.0565  $[M - C_{12}H_{14}O_3 + H]^+$ . Compound **36** possessed a molecular formula of  $C_{17}H_{20}O_3$  by the ion peak at  $m/z$  273.1488  $[M + H]^+$ ,  $m/z$  255.1391  $[M - H_2O + H]^+$ , and showed  $m/z$  227.1441  $[M - H_2O - CO + H]^+$ ,  $m/z$  149.0964  $[M - CH_3 - C_6H_6O_2 + H]^+$  and  $m/z$  82.8045  $[M - C_{11}H_{10}O_3 + H]^+$ , thus compound **36** was tentatively identified as 3(2H)-phenanthrenone, 1, 9, 10, 10a-tetrahydro-2, 6-dihydroxy-1, 1, 7-trimethyl by the mass information of database. Compound **44** with a molecular formula of  $C_{15}H_{20}O_4$  by  $m/z$  265.1481  $[M + H]^+$ , produced the fragment ions at  $m/z$  247.1332  $[M - H_2O + H]^+$ ,  $m/z$  229.1216  $[M - 2H_2O + H]^+$  and  $m/z$  187.1108  $[M - O - CH_2 - COO + H]^+$ , thus compound **44** was tentatively identified as ( $\pm$ )-abscisic acid by the mass information of database. Compound **57** had a molecular formula of  $C_{15}H_{20}O_4$  by the ion peak at  $m/z$  221.1900  $[M + H]^+$ , and showed the fragment ions at  $m/z$  175.1483  $[M - O - 2CH_2 - C + H]^+$ ,  $m/z$  161.1323  $[M - 2CH_3 - C - CH - O + H]^+$  and  $m/z$  147.1167  $[M - 2CH_3 - C - CH - CH_2 - O + H]^+$ . Therefore, compound **57** was tentatively identified as (-)-caryophyllene oxide by the mass information of database.

#### S6. Identification of organic acids

A total of 11 organic acids were discovered, including compounds **8**, **13**, **17**, **24**, **37**, **39**, **47**, **50**, **51**, **56**. Compound **8** had a molecular formula of  $C_{13}H_{14}O_5$  by the ion peak at  $m/z$  251.0915  $[M + H]^+$ , and showed  $m/z$  233.0804  $[M - H_2O + H]^+$ ,  $m/z$  221.0807  $[M - 2CH_3 + H]^+$  and  $m/z$  205.0857  $[M - H_2O - CO + H]^+$ , thus compound **8** was putatively identified as citrinin by the mass information of database. Compound **17** showed a molecular formula of  $C_{26}H_{40}O_{12}$  by the ion peak at  $m/z$  543.2421  $[M - H]^-$ , and showed  $m/z$  525.2305  $[M - H_2O - H]^-$  and 363.1800  $[M - H_2O - C_6H_{10}O_5 - H]^-$ , thus compound **17** should be picconioside B by the mass information of database. Compound **24** had the ion peak at  $m/z$  177.0545  $[M + H]^+$ , which indicated a molecular formula of  $C_{10}H_8O_3$  and showed  $m/z$  149.0596  $[M - CO + H]^+$ ,  $m/z$  133.0646  $[M - COO + H]^+$ ,  $m/z$  105.0693  $[M - CO - COO + H]^+$ ,  $m/z$  93.0098  $[M - CO - COO - C + H]^+$  and  $m/z$  81.0700  $[M - CO - COO - 2C + H]^+$ , thus compound **24** was putatively identified as 3-oxoindane-1-carboxylic acid by the mass information of database. Compound **37** showed the precursor ion at  $m/z$  187.0966  $[M - H]^-$ , which indicated a formula of  $C_9H_{16}O_4$ , was tentatively identified as 3-oxoindane-1-carboxylic acid [47], it produced similar fragment ions at  $m/z$  125.0966  $[M - COOH - OH - H]^-$  and  $m/z$  97.0654  $[M - 2COOH - H]^-$ . Compound **39** possessed a

molecular formula of  $C_9H_{14}O_4$ , and showed the ion peaks at  $m/z$  185.0819  $[M - H]^-$ ,  $m/z$  141.0916  $[M - COO - H]^-$  and  $m/z$  104.0775  $[M - C_6H_9 - H]^-$ , thus compound **39** was tentatively identified as 1-(carboxymethyl) cyclohexanecarboxylic acid by the mass information of database. Compound **47** showed the precursor ion at  $m/z$  201.1120  $[M - H]^-$ , with a molecular formula of  $C_{10}H_{18}O_4$  by , and showed  $m/z$  183.1020  $[M - OH - H]^-$  and  $m/z$  156.8982  $[M - COO - H]^-$ , hence compound **47** was putatively identified as 3-tert-butyladipic acid by the mass information of database. Compound **50** was tentatively identified as 9*S*, 13*R*-12-oxophytodienoic acid [72]. It presented a formula of  $C_{18}H_{28}O_3$  and produced several main fragment ions at  $m/z$  293.2104  $[M + H]^+$ ,  $m/z$  275.2003  $[M - H_2O + H]^+$ ,  $m/z$  239.1799  $[M - C_4H_6 + H]^+$ ,  $m/z$  147.1163  $[M - C_7H_{14} + H]^+$  and  $m/z$  81.0698  $[M - C_{12}H_{20}O_3 + H]^+$ . Compound **51** had the ion peak at  $m/z$  327.2165  $[M - H]^-$ , which suggested a molecular formula of  $C_{18}H_{32}O_5$ , and showed  $m/z$  242.9845  $[M - C_5H_4 - OH - H]^-$ ,  $m/z$  171.1019  $[M - C_9H_{16}O_2 - H]^-$  and  $m/z$  85.0291  $[M - C_{13}H_{22}O_4 - H]^-$ , thus compound **51** was tentatively identified as corchorifatty acid F [51]. The mass fragmentation of compound **56** was basically accordant with that of **51**, except that all the ion peaks of **56** were 2  $m/z$  value larger than those of **51**, which indicated a less of one double bond. Thus, compound **56** was tentatively identified as 3-tert-butyladipic acid [51].

## S7. Identification of others

Compound **12** was identified as 2, 4, 6-trihydroxy-2-(4-hydroxybenzyl) -1-benzofuran-3(2H)-one with  $m/z$  287.0551  $[M - H]^-$  ( $C_{15}H_{12}O_6$ ), and fragmentations at  $m/z$  161.0233  $[M - C_6H_6O_3 - H]^-$  and  $m/z$  125.0239  $[M - C_8H_2O_4 - H]^-$ . Compound **30** was tentatively identified as 6-hydroxy-8-methoxy-3-methyl-3, 4-dihydro -1H-isochromen-1-one. It presented a formula of  $C_{11}H_{12}O_4$  and produced several main fragment ions at  $m/z$  209.0802  $[M + H]^+$ ,  $m/z$  149.0596  $[M - COOCH + H]^+$  and  $m/z$  121.0647  $[M - 2OH - OCH_3 - CO + H]^+$ . Compound **34** had a molecular formula of  $C_{26}H_{28}O_{15}$  by the ion peak at  $m/z$  579.1325  $[M - H]^-$ , and exhibited  $m/z$  417.1531  $[M - C_6H_{10}O_5 - H]^-$ ,  $m/z$  300.0259  $[M - C_6H_8O_4 - C_5H_{10}O_4 - H]^-$ ,  $m/z$  271.0235  $[M - C_{11}H_{16}O_{10} - H]^-$  and  $m/z$  178.9979  $[M - C_{17}H_{20}O_{11} - H]^-$ , thus compound **34** was tentatively identified as graveobioside A [42]. Compound **54** had a molecular formula of  $C_{10}H_8O$  by the ion peak at  $m/z$  145.0647  $[M + H]^+$ , showed  $m/z$  116.0575  $[M - C - OH + H]^+$ ,  $m/z$  102.0468  $[M - C_2H_2 - OH + H]^+$  and  $m/z$  91.0539  $[M - C_3H_2 - OH + H]^+$ , thus compound **54** was tentatively identified as 1-naphthol by the published literature [53]. Compound **58** was tentatively identified as 4-methoxychalcone [73]. It presented a formula of

$C_{16}H_{14}O_2$  and produced several main fragment ions at  $m/z$  239.1073  $[M + H]^+$ ,  $m/z$  161.0595  $[M - C_6H_6 + H]^+$ ,  $m/z$  133.0647  $[M - C_7H_6O + H]^+$  and  $m/z$  105.0333  $[M - C_6H_6 - C_2H - OCH_3 + H]^+$ .
